## **CsrA-controlled proteins important for *Acinetobacter baumannii* desiccation tolerance**

Yasuhiro Oda<sup>1</sup>, Madelyn M. Shapiro<sup>1,2</sup>, Nathan M. Lewis<sup>1,3</sup>, Xuefei Zhong<sup>4,5</sup>, Holly K. Huse<sup>4,6</sup>, James E. Bruce<sup>4</sup>, Colin Manoil<sup>4</sup>, and Caroline S. Harwood<sup>1\*</sup>

<sup>1</sup>Department of Microbiology, University of Washington, Seattle, WA, USA

<sup>2</sup>Seattle Children's Hospital, Seattle, WA, USA

<sup>3</sup>Department of Plant and Microbial Biology, University of Minnesota, St Paul, MN, USA

<sup>4</sup>Department of Genome Sciences, University of Washington, Seattle, WA, USA

<sup>5</sup>Regeneron Pharmaceuticals, Tarrytown, NY, USA

<sup>6</sup>Huntington Hospital, Pasadena, CA, USA

\*Address correspondence to Caroline S. Harwood, [csh5@uw.edu](mailto:csh5@uw.edu)

Running title: *Acinetobacter baumannii* desiccation tolerance

Key words: *Acinetobacter baumannii*, desiccation, Tn-seq, CsrA, intrinsically disordered proteins

1 **ABSTRACT**

2 Hospital environments serve as excellent reservoirs for the opportunistic pathogen  
3 *Acinetobacter baumannii* in part because it is exceptionally tolerant to desiccation. To  
4 understand the functional basis this trait, we used transposon sequencing (Tn-seq) to identify  
5 genes contributing to desiccation tolerance in *A. baumannii* strain AB5075. We identified 142  
6 candidate desiccation tolerance genes, one of which encoded the global post-transcriptional  
7 regulator CsrA. We characterized CsrA in more detail by using proteomics to identify proteins  
8 that were differentially present in wild type and *csrA* mutant cells. Among these were a  
9 predicted universal stress protein A, an iron-containing redox protein, a KGG-domain containing  
10 protein, and catalase. Subsequent mutant analysis showed that each of these proteins was  
11 required for *A. baumannii* desiccation tolerance. The amino acid sequence of the KGG-domain  
12 containing protein predicts that it is an intrinsically disordered protein. Such proteins are critical  
13 for desiccation tolerance of the small animals called tardigrades. This protein also has a repeat  
14 nucleic acid binding amino acid motif, suggesting that it may protect *A. baumannii* DNA from  
15 desiccation-induced damage.

16

17

18

## 19 INTRODUCTION

20 Hospital-acquired infections are an important healthcare concern and economic burden (1, 2)  
21 and environmental persistence plays a critical role in the transmission of bacteria that cause  
22 these infections (3–6). One such bacterium is *Acinetobacter baumannii*, an opportunistic  
23 pathogen that infects very sick patients. It is responsible for about 2% of nosocomial infections  
24 in the United States and Europe and the frequencies are higher in the rest of the world. *A.*  
25 *baumannii* is especially problematic because on a global basis, about 45% of isolates are multi-  
26 drug resistant (7). A factor that contributes to the prevalence of *A. baumannii* in hospital settings  
27 is desiccation tolerance. *A. baumannii* can survive in a desiccated state on inanimate dry  
28 surfaces for days to several months (8–10). These surfaces include materials that are often  
29 encountered in the hospital, such as polyvinyl chloride, rubber, and stainless steel (11) .

30  
31 When desiccated, bacteria must respond to diverse stresses that include accumulation of  
32 reactive oxygen species, loss of cytoplasmic volume, and loss of cell membrane integrity (12,  
33 13). Proteomics analysis of *A. baumannii* showed that desiccated cells had higher levels of  
34 proteins involved in protein stabilization, antimicrobial resistance, and reactive oxygen species  
35 detoxification (14). Attributes of *A. baumannii*, that have been shown to be associated with  
36 desiccation tolerance include biofilm formation (15, 16) and protein aggregation (17). LpxM<sub>AB</sub>-  
37 dependent acetylation of lipid A is essential for survival of *A. baumannii* ATCC17978 at 40%  
38 humidity (18), and a *recA* mutant of ATCC17978, defective in DNA repair, had pleiotropic  
39 effects, including a defect in desiccation tolerance (19). *katE*, encoding catalase also  
40 contributes to desiccation tolerance (20). To further probe the functional basis for desiccation  
41 tolerance in *A. baumannii* we applied transposon sequencing (Tn-seq), an unbiased, high-  
42 throughput genetic screening approach, to generate a comprehensive list of genes that may be  
43 important for desiccation survival. From 142 candidate genes identified in the Tn-seq screen,  
44 single mutant analysis of a small subset revealed six genes that likely contribute to desiccation

45 tolerance, one of which was *csrA* (ABUW\_2750). *csrA* encodes a global post-transcriptional  
46 regulator found in gamma-proteobacteria and was recently reported by another group as  
47 important for desiccation tolerance of *A. baumannii* (21). Here we expanded on this recent  
48 report and identified CsrA-controlled proteins, several of which turned up in the Tn-seq screen,  
49 that play a role desiccation survival.

50

51

## 52 **RESULTS**

53 **Desiccation assay.** Previous studies have shown that *A. baumannii* can survive in a desiccated  
54 state for days to several months (8–11, 20). For these and other desiccation studies,  
55 investigators worked with a variety of strains and usually incubated cells at either 30% relative  
56 humidity (RH) or in room air, which varied between 25 and 61% RH in one study (20). These  
57 differences can make it difficult to compare desiccation phenotypes between studies. Thus we  
58 thought it important to establish a robust desiccation assay that reduces experimental variables  
59 like choice of strains, drying times, and RH during desiccation.

60

61 Following from previous reports, saturated calcium chloride hexahydrate solution placed in a  
62 sealed plastic Snapware container caused the RH inside the container to rapidly equilibrate to  
63 30% (9). We found that use of DRIERITE instead of calcium chloride, resulted in an RH of 2%.  
64 To test desiccation tolerance, we grew bacteria to a desired density in tryptone-yeast extract  
65 (TY) broth, harvested them, washed them twice with phosphate buffer, and resuspended them  
66 in buffer to a final OD<sub>600</sub> of 1. Drops of cell suspension were placed on polycarbonate  
67 membranes and filtered to allow for rapid drying. The membranes were placed in uncapped 15  
68 ml conical centrifuge tubes and incubated in desiccation containers. After various periods of  
69 incubation, buffer was added to each centrifuge tube followed by 5 min of shaking on a rotary  
70 shaker. Viable cell numbers were then determined by plating on TY agar. To control for the

71 stress of filtration we did viable counts immediately following filtration and took this as our “day  
72 0” time point.

73

74 **Relative desiccation tolerance of *A. baumannii* strains.** As shown in Fig 1A, *A. baumannii*  
75 strain AB5075 and *Escherichia coli* strain W3100 each survived desiccation at 30% RH far  
76 better than *Pseudomonas aeruginosa* strain PAO1. However at 2% RH, *A. baumannii* survived  
77 far better than either *E. coli* or *P. aeruginosa*. As has been reported (20, 22), we found that *A.*  
78 *baumannii* stationary phase cells were much more tolerant to desiccation than actively growing  
79 cells (Fig. S1) and so we routinely used stationary phase cells in our desiccation assays. We  
80 also tested the desiccation tolerance of two additional frequently used laboratory strains of *A.*  
81 *baumannii*, ATCC17978 and ATCC19606, and found that they did not survive well when  
82 desiccated at 2% RH for six days (Fig. 1B). However, these strains survived when the RH was  
83 30%, which is similar to the RH of many hospital environments. Strain-to-strain variation in  
84 desiccation tolerance has previously been reported (10, 20).

85

86 In our desiccation experiments we wanted to use a condition under which *A. baumannii* survived  
87 better than *E. coli* and we also wanted to provide strong selection pressure in our screen for  
88 genetic determinants of desiccation tolerance. To satisfy these requirements we used *A.*  
89 *baumannii* strain AB5075 and 2% RH in subsequent experiments. This strain was isolated from  
90 a surgical wound, is multidrug resistant and is highly virulent in an animal model (23). A  
91 comprehensive ordered mutant library of AB5075 is available that has two to three sequenced Tn  
92 insertions in each gene and is called the three-allele library (24).

93

94 **Unbiased screening to identify desiccation sensitive mutants by Tn-seq.** To begin to  
95 define genetic mechanisms underlying desiccation tolerance in *A. baumannii*, we created a  
96 saturating high-density transposon mutant pool containing approximately 400,000 individual *A.*

97 *baumannii* mutants. We grew the transposon mutant pool to stationary-phase and plated cells  
98 on TY medium at day 0 and day 6 of desiccation at 2%RH. After a brief period of growth, cells  
99 were harvested, pooled and processed for mapping of Tn insertions. The transposon mutant  
100 pool survived desiccation as well as wild-type strain AB5075, indicating that the transposon  
101 itself did not affect desiccation tolerance (Fig. S2).

102  
103 Excluding genes that were not well-represented (less than 100 Tn reads/kb) in the day 0 sample,  
104 we found that 142 genes showed a 2.5-fold or more decrease in abundance of Tn insertions  
105 after 6 days of desiccation (Table S1). We picked 12 genes that had a 10-fold or more decrease  
106 in transposon insertions after a 6-day period of desiccation to validate their desiccation  
107 phenotypes. When possible, we tested two different transposon mutants (transposon insertions  
108 in different positions of the gene) for each of these 12 genes from the three-allele library. A.  
109 *baumannii* AB5075 produces opaque and translucent colony variants that interconvert at high  
110 frequency and reflect changes in the thickness of capsular exopolysaccharide (25). AB5075  
111 cells with decreased capsule production were as much as 100-fold more sensitive to desiccation  
112 (26). Here, we used only opaque colonies of AB5075 and its mutant derivatives in our  
113 desiccation assays. We found that when mutated, six of the 12 genes we tested had 2-fold or  
114 greater defects in desiccation tolerance (Table 1). We were interested to see that one of the  
115 genes was *csrA*. CsrA, also called RsmA in some bacteria, is an important global regulator of  
116 mRNA translation in gamma proteobacteria. It has diverse effects on many processes including  
117 motility, biofilm formation, quorum sensing and secretion of virulence factors, depending on the  
118 species (27–30).

119  
120 **CsrA is critical for desiccation tolerance** *csrA* mutants from the three-allele library were  
121 only two-fold more sensitive to desiccation than the wild type. To try to confirm its importance for  
122 desiccation tolerance we constructed a *csrA* deletion mutant ( $\Delta csrA$ ). We found that the  $\Delta csrA$

123 strain grew poorly on TY agar and had an elongated cell morphology when grown in TY broth  
124 (Fig. 2A). On agar plates, large colonies frequently appeared on a background of poor growth,  
125 likely due to occurrence of second site suppressor mutations in the  $\Delta csrA$  strain. The  $\Delta csrA$   
126 strain was also defective in growth on other nutrient-rich media, including Luria broth, nutrient  
127 broth, and tryptone soy broth. A similar sensitivity to growth in complex media was reported by  
128 Farrow et al for a several *A. baumannii* strains including strain AB5075 (21). In agreement with  
129 Farrow et al., a  $\Delta csrA$  mutant grew as the wild type in defined medium, in our case, M9 minimal  
130 medium with 10 mM succinate as a sole carbon source (M9/succinate), and it had close to a  
131 wild type cell morphology (Fig 2A). A *Yersinia enterocolitica csrA* mutant, has a growth defect in  
132 LB due to the presence of 90 mM of NaCl (31). However, the *A. baumannii*  $\Delta csrA$  mutant was  
133 not sensitive to NaCl. In fact, the mutant grew in M9/succinate supplemented with up to 100 mM  
134 of NaCl without a significant reduction of growth compared to the wild type.

135

136 When desiccated after growth in M9/succinate to stationary phase, the  $\Delta csrA$  mutant lost almost  
137 all viability over 6 days (Fig. 2B and Table 1). The desiccation phenotype was complemented  
138 by expressing *csrA in trans*.  $\Delta csrA$  mutant cells incubated for 6 days after being filtered and  
139 resuspended in PBS remained fully viable (Fig 2B). As we were preparing this paper for  
140 publication, Farrow et al reported that *csrA* mutants of *A. baumannii* strains AB09-003 and  
141 ATCC 17961 were sensitive to desiccation in room air over a period of 14d. CsrA in these  
142 strains was also required for biofilm formation and virulence in a *Galleria melonella* infection  
143 model (21).

144

145 **CsrA affects multiple cellular processes in *A. baumannii*.** To identify genes whose  
146 translation might be regulated by CsrA, we compared the proteomes of wild-type and  $\Delta csrA$   
147 cells (Table S3A). There were 97 proteins present at higher levels in the  $\Delta csrA$  mutant

148 compared to the wild type (ratio of  $\Delta csrA$ /WT  $\geq 2.5$ , Table S3B). Among these were proteins for  
149 type IV pilus assembly, synthesis of the siderophore ferric acinetobactin, and a  
150 glutamate/aspartate transporter. The  $\Delta csrA$  mutant also had elevated levels of enzymes for for  
151 the catabolism of hydroxycinnamates, phenylacetate and quinate. Levels of an alcohol  
152 dehydrogenase (ABUW\_1621) and an aldehyde dehydrogenase (ABUW\_.1624) were also  
153 elevated. The  $\Delta csrA$  mutant was defective in pilus-mediated twitching motility as assessed by  
154 movement across a soft-agar plate (Fig. 3A). The mutant also had a severe growth defect when  
155 grown on succinate in the presence of ethanol (Fig. 3B). One possible explanation for this is that  
156 the *csrA* mutant metabolized ethanol to form toxic acetaldehyde to levels that slowed growth,  
157 and insufficient aldehyde dehydrogenase activity was present in cells to relieve this toxicity.  
158

159 There were 106 proteins present in lower amounts in the  $\Delta csrA$  mutant compared to the wild  
160 type (ratio of WT/ $\Delta csrA$   $\geq 2.5$ , Table S3C). A large proportion of these (39%) are annotated as  
161 hypothetical proteins. Several membrane proteins, and proteins annotated as involved in  $\beta$ -  
162 lactam antibiotic resistance (ABUW\_1194, 2619, and 3497), trehalose synthesis (ABUW\_3123)  
163 and possibly biofilm formation (ABUW\_0916) were in lower abundance in the  $\Delta csrA$  mutant  
164 compared to wild type. As reported previously, a  $\Delta csrA$  mutant did not form biofilms, (Farrow  
165 2020) and this phenotype was complemented by expressing *csrA* gene *in trans* (Fig. 3C). The  
166  $\Delta csrA$  proteome profile also suggested that CsrA was involved in promoting the expression of  
167 proteins involved in oxidative stress, including peroxidase (ABUW\_0628) and catalase (*katE*,  
168 ABUW\_2436). When tested for catalase activity, we found that the  $\Delta csrA$  mutant lacked this trait  
169 (Fig. 3D).

170

171 **Genes important for desiccation tolerance in *A. baumannii* AB5075.** We took advantage  
172 of the three-allele transposon library to test how important some of the gene transcripts that  
173 were likely to be controlled CsrA were for desiccation tolerance. All the genes that we found to



174 possibly be important for desiccation tolerance are listed in Table 1. The results of desiccation  
175 assays for all the mutant strains that we tested in this study are listed in Table S2. *katE*, and  
176 *ABUW\_2639* mutants were about 5-fold more sensitive to desiccation than the wild type,  
177 whereas *ABUW\_2433* and *ABUW\_2437* mutants were greater than 100 fold more sensitive to  
178 desiccation than the wild type (Table 1, Fig 4). The phenotypes of *ABUW\_2433* and  
179 *ABUW\_2437* mutants could be complemented (Fig S3). The *ABUW\_2433* protein has 411  
180 amino acids and is annotated as a KGG domain-containing protein. The KGG domain  
181 comprises a small region in the N-terminus of the protein and the remainder of the protein is  
182 annotated by InterPro as a disordered region that includes a series of AT\_hook DNA binding  
183 motifs (SMART SM00384). The full length *ABUW\_2433* sequence was predicted to be  
184 intrinsically unstructured when queried with the IUPred3 tool (<https://iupred.elte.hu>) (32).  
185 *ABUW\_2437* is annotated as an iron-containing redox enzyme or a heme-oxygenase -like  
186 protein (Fig 4). The predicted *ABUW\_2437* transcript has traits characteristic of a target of  
187 CsrA post-transcriptional regulation. The DNA sequence predicts a relatively long (316 bp) 5'  
188 untranslated region (316 bp) and there is a predicted CsrA binding motif (GGA) in the ribosome  
189 binding site of the transcript. *ABUW\_2639* is annotated as belonging to a universal stress  
190 protein A family. It has been shown to protect *A. baumannii* ATCC17987 from oxidative stress of  
191 hydrogen peroxide (33).

192  
193 We wondered if *ABUW\_2433* and *ABUW\_2437* might play a role in promoting desiccation  
194 tolerance of the two *A. baumannii* strains, ATCC17978 and ATCC19606, that do not survive  
195 well at 2% RH (Fig 1B). ATCC19606 has the gene region shown in Fig 4 intact, but the gene  
196 that is homologous to *ABUW\_2433*, encoding the KGG domain-containing protein, is annotated  
197 as a pseudogene. ATCC 17978 appears to be missing a gene homologous to *ABUW\_2433*.  
198 However it has contiguous *katE* and iron-containing redox protein genes (*A1S\_1386* and  
199 *A1S\_1385*). Expression of the two *AB5075* genes *in trans* improved the survival of the two

200 ATCC strains at 2% RH (Fig 5), providing evidence that ABUW\_2433 and ABUW\_2437 are  
201 generally important for desiccation tolerance.

202

203 **Other possible desiccation tolerance genes.** As shown in Table 1, we identified an  
204 additional five genes, some but not all of which are likely regulated by CsrA, that may have a  
205 small role in desiccation tolerance. *otsA*, encoding trehalose-6-phosphate synthase, is the only  
206 one of the five for which we can hypothesize some connection to desiccation. Trehalose has  
207 been shown to play a significant role in desiccation tolerance of eukaryotes and bacteria (34,  
208 35) and trehalose added extrinsically to cultures increased the desiccation tolerance *A.*  
209 *baumannii* ATCC 19606 (22). However, a  $\Delta mtID$ -*otsB* mutant of ATCC19606, defective in  
210 endogenous production of the compatible solutes, mannitol and trehalose, was not more  
211 sensitive to desiccation than the wild type (22).

212

## 213 **DISCUSSION**

214 Depletion of water during desiccation leads to loss of membrane integrity and accompanying  
215 disruption of aerobic respiration results in the generation of reactive oxygen species, including  
216 hydrogen peroxide (36). That *katE*, encoding catalase, contributes to desiccation tolerance  
217 makes sense in this context. Proteomics analyses of *A. baumannii* showed that proteins  
218 involved in redox defense including catalase, alkyl peroxidase reductases and superoxide  
219 dismutase were elevated in stationary-phase cells (37), which is consistent with the observation  
220 made by many that cells stationary-phase cells survive desiccation much better than  
221 exponentially growing cells.

222

223 Since the desiccation -tolerance genes *ABUW\_2433* and *ABUW\_2437* are near or adjacent to  
224 *katE*, it seemed important to consider that they might somehow mediate oxidative stress

225 tolerance even though the amino acid sequences of the encoded proteins don't have motifs  
226 typically associated with reactive oxygen species detoxification. However, we were unable to  
227 demonstrate that *ABUW\_2433::Tn* and *ABUW\_2437::Tn* mutants were sensitive to hydrogen  
228 peroxide, nitrous oxide or paraquat - all powerful oxidizing agents. In addition, a study that  
229 looked at effects of hydrogen peroxide exposure on gene expression in *A. baumannii*, found that  
230 *katE* but not *ABUW\_2433* or *ABUW\_2437*, was expressed at elevated levels and neither of  
231 these genes is part of the OxyR regulon that controls the response to oxidative stress in *A.*  
232 *baumannii* (38).

233

234 The physical properties and cellular function of *ABUW\_2433* will be fascinating to explore. It is  
235 an intrinsically disordered protein that is highly hydrophilic, with 27% positively charged amino  
236 acids residues and 31% negatively charged residues. It is also predicted to assume a collapsed  
237 or extended conformation, likely depending on its context (ROBETTA PFRMAT TS prediction;  
238 <https://robetta.bakerlab.org>). *ABUW\_2433* has 13 repeated AT-hook DNA binding motifs that  
239 occupying about 70% of the protein. This motif preferentially binds to AT-rich sequences in the  
240 minor groove of DNA. AT-hook DNA binding motifs are found primarily in eukaryotic proteins,  
241 many of which have roles in transcriptional regulation (39, 40). Only 8.5% of annotated AT hook  
242 DNA binding motifs are found in bacteria, but about half of these are found in gamma  
243 proteobacteria, the group to which *A. baumannii* belongs. We hypothesize that *ABUW\_2433*  
244 binds to *A. baumannii* DNA and somehow protects it from desiccation-induced damage. IDPs  
245 are critical for the microscopic animals called tardigrades to survive desiccation. When  
246 desiccated, some of these proteins vitrify and probably trap desiccation sensitive molecules in a  
247 noncrystalline amorphous matrix, thereby protecting them from denaturation or other forms of  
248 destruction (41, 42). IDPs or proteins with intrinsically disordered regions are less common in  
249 prokaryotes than in eukaryotes, but drawing from work on eukaryotes, they have been proposed  
250 to play a central role in cellular process in bacteria that may depend on the formation of

251 molecular condensates (43). It is possible that this is important for the viability of desiccated *A.*  
252 *baumannii*.

253

254 Although not much work has been done on *Acinetobacter* CsrA, based on what is known for  
255 other gamma proteobacteria, we hypothesize that a set of ncRNAs that is induced by a GacSA  
256 (ABUW\_3306 and ABUW\_3639) two -component regulatory system, controls the repressor  
257 activity of CsrA by sequestering it (44). We can draw a link between the GasSA system and  
258 CsrA because they both appear to control catabolism of the aromatic compound phenylacetate.  
259 An *A. baumannii*  $\Delta$ *gacA* mutant is unable to catabolize phenylacetate (45), and our proteomics  
260 results suggest that CsrA acts to repress the synthesis of at least one enzyme required for  
261 phenylacetate degradation. We hypothesize that a  $\Delta$ *gacA* mutant does not synthesize ncRNAs  
262 that would normally “sponge-up” CsrA, thus allowing CsrA to bind to the 13 -gene phenylacetate  
263 mRNA transcript to repress its translation. At this point we do not have a clear understanding of  
264 the inventory of *A. baumannii* ncRNAs that may bind to CsrA, but ncRNAs are abundant in  
265 AB5075, with several of them expressed at extremely high levels (46). The desiccation  
266 phenotype of CsrA appears to depend on its ability to activate translation and although it’s  
267 difficult to reconcile this activity with a model where CsrA is sequestered by ncRNAs, it is known  
268 that ncRNA turnover can occur resulting in the release of free CsrA (29). Most of what is known  
269 about mechanisms of CsrA action centers on its role as a repressor of translation (30, 47–49)  
270 and it may be of interest to probe its capability as an activator in *A. baumannii*.

271

272 We found that *A. baumannii* AB5075 survived desiccation for six days at 2% RH much better  
273 than two other *A. baumannii* strains that we tested, but it is important to note that most studies  
274 of desiccation tolerance have been carried out at about 30% RH or in room air and the  
275 emphasis has been on the number of days or months that a particular strain remains viable

276 when desiccated. When Farrow et al (20) tested the survival of several strains that were dried  
277 and incubated at a relative humidity of 25–61% (mean 46%) they found AB5075 to have an  
278 average survival time of 90 days, whereas strains ATCC19606 and ATCC17978 had average  
279 survival times of 3 and 34 days respectively. Even though AB5075 is tolerant to desiccation  
280 over months at a mean RH of 46% and over days at 2% RH, we cannot necessarily conclude  
281 that the same sets of genes are needed for desiccation tolerance under these two different  
282 conditions. For example, Farrow et al. (20) found that the response-regulator protein BmfR was  
283 important for desiccation tolerance of ATCC17978 in long term desiccation assays, whereas we  
284 did not observe a role of *bmfR* in protecting AB5075 from desiccation in shorter term  
285 incubations at 2%RH (Table S2).

286

287 The emergence of *A. baumannii* is great threat in healthcare facilities worldwide, and there is an  
288 urgent need for development of new antibiotics and new strategies for infection control and  
289 prevention. Since CsrA is involved in several clinically important traits, including desiccation  
290 tolerance, biofilm formation, and pathogenesis, the development of modulators of CsrA-RNA  
291 interactions may have potential for improving the efficacy of biocides or for treatment of *A.*  
292 *baumannii* infections (50).

293

## 294 **MATERIALS AND MESTHODS**

295 **Bacterial strains and growth conditions.** Strains used in this study are listed in Table S4A.  
296 Strain AB5075 (AB5075-UW) was used as a wild type (24) and individual transposon mutants  
297 were obtained from the Manoil lab comprehensive ordered transposon mutant library at the  
298 University of Washington (24). All strains except for the  $\Delta csrA$  mutant were routinely grown and  
299 maintained in TY (10 g Tryptone, 5 g Yeast extract, and 8 g NaCl in 1000 ml) medium or BBL  
300 Trypticase Soy Broth (TSB) media at 37°C, unless otherwise stated. The  $\Delta csrA$  mutant was  
301 grown in M9/succinate.

302

303 **Desiccation assay.** Strains from a frozen stock (-80°C ) were streaked onto TY plates and  
304 incubated at 37°C. Colonies (three to five) were picked and inoculated into 2 ml of TSB, and  
305 cultures were grown overnight at 37°C with a shaking speed of 200rpm. Overnight cultures were  
306 diluted to yield an initial OD<sub>600</sub> of 0.025 in 10 ml TSB in a 50 ml Erlenmeyer flask. Cultures were  
307 grown at 37°C with a shaking speed of 200 rpm to mid-exponential-phase (OD<sub>600</sub>=0.4 to 0.6) or  
308 stationary-phase (24 hours after inoculation). Cells were harvested by centrifugation and  
309 washed twice with Dulbecco's phosphate-buffered saline (DPBS, Gibco), and cell density was  
310 adjusted to OD<sub>600</sub>=1 (about 5 x 10<sup>8</sup> cells/ml) with DPBS. Cell suspension (2 spots of 50 µl each  
311 per membrane) was filtered onto a 0.4 µm Whatman nucleopore polycarbonate track-etched  
312 membranes (25 mm diameter) that had been placed in Nalgene analytical filter unit, and the  
313 membranes were then placed into 15 ml uncapped centrifuge tubes. To obtain the T0 (baseline)  
314 viable cell number, 1 ml of DPBS was immediately added to one tube and incubated for 5 min at  
315 room temperature (24 ± 2°C) on a rotary shaker. Viable cell numbers were determined by  
316 plating on TSB agar. For desiccation, tubes with membranes were placed in a Snapware  
317 containers (2.3 x 6.3 x 8.4 inches) that contained DRIERITE in the lids of 50 ml centrifuge tubes  
318 (x4, 7.5 g of DRIERITE desiccant in each lid) or saturated calcium chloride hexahydrate solution  
319 in 5 ml beaker (x8) to yield the RHs of 2% or 30% (± 2), respectively. The Snapware containers  
320 were incubated at room temperature. Digital hygrometers (VWR International Ltd) were placed  
321 in each container to monitor the RH. At desired time points, tubes containing membranes were  
322 removed from the containers, 1 ml of DPBS was added to each tube, and incubated for 5 min at  
323 room temperature on a rotary shaker. Viable cell counts were determined on TSB agar. For  
324 each strain, a minimum of three biological replicates of desiccation assays were performed  
325 except for individual transposon mutants, which were assayed twice for each allele.

326

327 **Screening of desiccation sensitive mutant by Tn-seq.** We created a high-density transposon  
328 mutant pool containing approximately 400,000 *A. baumannii* mutants by combining two  
329 separately constructed transposon mutant pools. The first transposon mutant pool was  
330 previously constructed and selected on LB agar (24) The second transposon mutant pool was  
331 constructed on Neidhardt MOPS minimal medium (51) excluding NaCl, and sodium succinate  
332 was used as a sole carbon source as follows: T26 mutagenesis was carried out as previously  
333 described (24), except following electroporation, cells were incubated in 1 ml of minimal medium  
334 with rolling at 37°C for 2 hours. Cells were flash frozen in 5% dimethyl sulfoxide (DMSO) and  
335 stored at -80°C for later selection. For selection, frozen cell aliquots were thawed on ice,  
336 pelleted, re-suspended in 1 ml fresh minimal medium, and plated onto a Q-tray (Genetix)  
337 containing 250 ml minimal medium, 1.2% agarose, and 12.5 µg/ml tetracycline (Tc). After  
338 incubating for 16 h at 37°C, cells were scraped, resuspended in 3.5 ml of minimal medium  
339 supplemented with 10% glycerol, and aliquots were flash frozen and stored at -80°C. This  
340 yielded a density of approximately 1,000 to 2,000 transposon mutants per Q-tray. We repeated  
341 these procedures a total of 69 times, and all 3.5 ml aliquots were thawed and mixed to create  
342 the final transposon mutant pool, which resulted in a total of approximately 120,000 individual  
343 transposon mutants from minimal medium. Finally, 1 ml aliquots of the final transposon mutant  
344 pool were flash frozen and stored at -80°C.

345 Aliquots of the transposon mutant pools derived from LB and minimal media were thawed  
346 on ice. To account for differences in cell density, 100 µl of the LB transposon mutant pool and 1  
347 ml of the minimal medium transposon mutant pool were pelleted and resuspended in 1 ml TSB,  
348 and the cells densities for each transposon mutant pool were adjusted to OD<sub>600</sub>=1.0. These  
349 samples were diluted 1:200 in 12.5 ml of TSB in a 250 ml Erlenmeyer flask and incubated at  
350 37°C for 24 hours. Cells from each culture were harvested by centrifugation, washed twice with  
351 DPBS and cell density was adjusted to OD<sub>600</sub>=1 with DPBS. The transposon mutant pools were  
352 combined in a 2:1 ratio of LB to minimal medium transposon mutant pool. Cell suspension (2



353 spots of 50  $\mu$ l) was filtered and membranes were treated as described above, except in addition  
354 to viable counts, the remaining cells that were resuspended from the membrane (about 900  $\mu$ l)  
355 were plated onto TSB in a Q-tray and incubated for 4-5 hours, which resulted in a thin film of  
356 growth. Cells were scraped, resuspended in 1 ml DPBS, centrifuged, and frozen at  $-80^{\circ}\text{C}$  for  
357 Tn-seq library preparation. Two biological replicates of Tn-seq were performed.

358

359 **Tn-seq library preparation, Illumina sequencing, and data analysis.** Genomic DNA from  
360 samples desiccated for 0 or 6 days were extracted using the DNeasy Blood and Tissue Kit  
361 (Qiagen). Tn-seq libraries were prepared using the terminal deoxynucleotidyl transferase (TdT)  
362 method as previously described (24, 52), and sequencing was carried out on an Illumina Miseq  
363 platform. Total reads were ranged from approximately 3.8 to 7.7 million. Oligonucleotides used  
364 in this study are listed in Table S5B. Reads were normalized, mapped, and counted using  
365 custom Python scripts available at Github (<https://github.com/elijweiss/Tn-seq>). Reads were  
366 further normalized to gene length. To identify candidate genes important for desiccation  
367 resistance, reads from both biological replicates were averaged for samples desiccated for 0 or  
368 6 days.

369

370 **Construction of the  $\Delta$ *csrA* mutant.** In-frame deletion of the *csrA* (ABUW\_2750) gene was  
371 generated by overlap extension PCR as described (53). PCR primers are listed in Table S5B.  
372 PCR product was cloned into mobilizable suicide vector pEX2-TetRA and transformed into *E.*  
373 *coli* NEB 10-beta (New England Bio Labs). The sequence-verified deletion construct was  
374 transformed into *E. coli* S17-1, and further mobilized into *A. baumannii* strain AB5075 by  
375 conjugation on TY agar. Single recombinant conjugants were first selected on M9/succinate  
376 plate containing 20  $\mu\text{g/ml}$  Tc, and Tc resistant colonies were further plated onto M9/succinate  
377 plate containing 5% sucrose. Sucrose resistant and Tc sensitive colonies were screened by



378 colony PCR and sequencing to validate the expected chromosomal in-frame deletion of the *csrA*  
379 gene.

380

381 To complement the  $\Delta csrA$  mutant, the full length *csrA* gene including the 15 bp upstream that  
382 contains the putative ribosome binding site was PCR amplified and cloned into pMMB67EH-  
383 TetRA. The construct was transformed into *E. coli* NEB 10-beta (New England Bio Labs). The  
384 sequence-verified construct was transformed into *E. coli* S17-1, and further mobilized into the  
385  $\Delta csrA$  mutant by conjugation on M9/succinate plate containing 20  $\mu$ g/ml Tc. As a negative  
386 control, empty vector pMMB67EH-TetRA was used. The same procedure was used to clone  
387 ABUW\_2433 and ABUW\_2437 for complementation experiments.

388

389 **Label-free protein quantification.** Since the  $\Delta csrA$  mutant had severe growth defect on TY  
390 media, both wild type and  $\Delta csrA$  mutant were grown in M9/succinate. Two biological sample  
391 replicates were prepared for each strain. Cells from each culture were harvested at OD600=0.5  
392 by centrifugation, washed twice with DPBS, and cells were stored in -80°C before further  
393 analysis. Cells were lysed in buffer containing 4% SDS, 100 mM Tris pH8.0, 10 mM DTT by  
394 heating at 95°C for 5 min. After cooling to room temperature, the lysates were sonicated with  
395 ultrasonication probe on ice to shear DNA. Total protein concentration was determined by the  
396 BCA assay (Thermo Pierce, Rockford, IL). 500  $\mu$ g of each protein lysate was reduced and  
397 alkylated, diluted in 8 M urea solution, and the SDS was removed with a 3kD molecular weight  
398 cutoff filter. After buffer exchange, the protein lysates were digested with trypsin (Promega,  
399 Madison, WI) at 37°C overnight and the digested samples were desalted with 1cc C18 Sep-Pak  
400 solid phase extraction cartridges (Milford, MA, Waters). The eluted samples were vacuum dried  
401 and resuspended in 0.1% formic acid. Reverse phase nanoLC-MS analysis of the protein  
402 digests was carried out with a Thermo Easy-nanoLC coupled to a Thermo Q-Exactive Plus  
403 Orbitrap mass spectrometer. Triplicate top 20 data-dependent acquisition runs were acquired

404 for each sample, and 1  $\mu\text{g}$  of protein digest was loaded for each run. The peptides were  
405 separated by a 50 cm x 75  $\mu\text{m}$  I.D C8 column (5  $\mu\text{m}$  diameter, 100  $\text{\AA}$  pore size C8  
406 MichromMagic beads) with a 90 min 10 to 30% B gradient (solvent A: 0.1% formic acid in water,  
407 solvent B: 0.1% formic acid in acetonitrile, flow rate 300 nl/min). The MS data acquisition  
408 parameters were set as follows: full MS scan resolution 70k, maximum ion injection time 100  
409 mS, AGC target  $10^6$ , scan range of 400 to 2000 m/z; MS/MS scan resolution 17.5 k, maximum  
410 ion injection time 100 mS, AGC target  $5^4$ , isolation window 1.6 m/z, HCD NCE 35 scan range of  
411 200 to 2000 m/z; loop count 20, intensity threshold  $5^3$ , underfill ratio 1%, dynamic exclusion 10  
412 sec. High resolution MS<sup>2</sup> spectra were searched against a target-decoy proteome database of  
413 strain AB5075 (a total of 7678 sequences) downloaded from Uniprot (Oct17, 2017) using Comet  
414 (version 2015.02 rev. 1) (54) with following parameters: precursor peptide mass tolerance 20  
415 ppm, allowing for -1, 0, +1, +2, or +3 <sup>13</sup>C offsets; fragment ion mass tolerance 0.02 Da; static  
416 modification, carbamidomethylation of cysteine (57.0215 Da); variable modification, methionine  
417 oxidation (15.9949 Da). The search results were further processed by PeptideProphet (55) for  
418 probability assignment to each peptide-spectrum match, and ProteinProphet (56) for protein  
419 inference and protein probability modeling. The output pepXML files from three technical  
420 replicates were grouped for subsequent spectral counting analysis using Abacus (57). The  
421 pepXML and protXML files for each sample, combined ProteinProphet file from all samples  
422 were parsed into Abacus for spectral counting of each protein. The following filters were applied  
423 for extracting spectral counts from MS/MS datasets: (1) the minimum PeptideProphet score the  
424 best peptide match of a protein must have  $\text{maxlniProbTH}=0.99$ ; (2) The minimum  
425 PeptideProphet score a peptide must have to be even considered by Abacus,  $\text{iniProbTH}=0.50$ ;  
426 (3) The minimum ProteinProphet score a protein group must have in the COMBINED file,  
427  $\text{minCombinedFilePw}=0.90$ . Spectral counts for 1616 proteins were reported across four sample  
428 groups (two strains and two biological replicates) with estimated protein false discovery rate of

429 1.94%. The protein expression fold changes between wild type AB5075 and  $\Delta csrA$  mutant were  
430 computed from adjusted spectral counts output from Abacus.

431

432 **Phenotypic characterization of the  $\Delta csrA$  mutant.** M9/succinate was used in all experiments.

433 For motility assays, an overnight culture (16 to 18 hours) was diluted to yield  $OD_{600}=0.5$ , and 2

434  $\mu$ l of sample was spotted onto the freshly prepared M9/succinate plate and incubated at 37°C

435 for 24 h. For biofilm assays, an overnight culture was inoculated into 100  $\mu$ l of M9/succinate in

436 Costar vinyl 96 well “U” bottom plates (initial  $OD_{600}=0.05$ ), and the plates were sealed with

437 Breath-Easy sealing membranes. After incubation at room temperature for 48 hours, culture

438 was removed, the plate was rinsed with tap water twice, and 150  $\mu$ l of 0.1% crystal violet

439 solution was added to each well. After incubating at room temperature for 15 min, crystal violet

440 solution was removed, the plate was rinsed with tap water 5 times, and the plate was dried at

441 room temperature. For catalase assays, cells were harvested at  $OD_{600}=0.5$ , supernatant was

442 removed, and cells were resuspended in DPBS to yield 10 mg wet cell/100  $\mu$ l DPBS. 100  $\mu$ l of

443 cell suspensions were placed in 13 x 100 mm borosilicate glass tubes. Then 100  $\mu$ l of 1% Triton

444 X-100 and 100  $\mu$ l of 30% hydrogen peroxide were added, mixed thoroughly, and incubated for

445 15 min at room temperature (58).

446 .

447

#### 448 **ACKNOWLEDGMENTS**

449 We thank Dr. Hemantha Don Kulasekara and Dr. Samuel Miller (University of Washington) for

450 sharing the pEX2-TetRA and pMMB67EH-TetRA vectors. We thank Indranil Biswas for alerting

451 us to the possibility that intrinsically disordered proteins could be involved in desiccation

452 tolerance in *A. baumannii*.

453

#### 454 **FUNDING**

455 This work was supported by the Functional Genomics Program, National Institute of Allergy and  
456 Infectious Diseases under Grant 1U19AI107775-01.

457 **FIGURE LEGENDS**

458 **Figure 1.** Desiccation tolerance of *A. baumannii*. (A) Comparison of AB5075, *E. coli* W3110,  
459 and *P. aeruginosa* PAO1 at 30% RH or 2% RH. (B) Desiccation tolerance of *A. baumannii*  
460 strains AB5075, ATCC17978, and ATCC19606 after 0 days (control) and 6 days of desiccation  
461 at 30% RH or 2% RH. The cell numbers represent the total number of viable cells recovered  
462 from each membrane. The data are the average of three or more biological replicates, and  
463 standard deviations are shown as the error bars.

464

465

466 **Figure 2.** Growth and desiccation tolerance of the  $\Delta csrA$  mutant (A) Comparison of wild type  
467 (WT) and the  $\Delta csrA$  mutant on TY and M9/succinate agar and in TY and M9/succinate broth. (B)  
468 Desiccation tolerance of WT,  $\Delta csrA$  mutant,  $\Delta csrA$  mutant with pMMB (empty vector), and  $\Delta csrA$   
469 mutant with *csrA* expressed in trans (pAB2750) at day 0 and at day 6 of desiccation at 2% RH  
470 or at 6 days in PBS. The cell number represents the total number of viable cells recovered from  
471 each membrane. The data are the average of three or more biological replicates, and standard  
472 deviations are shown as the error bar.

473

474 **Figure 3.** Phenotypes of the  $\Delta csrA$  mutant: (A) twitching motility; (B) growth of wild type (black  
475 symbol) or the  $\Delta csrA$  mutant (red symbol) in M9/succinate in the absence (closed symbol) or  
476 presence (open symbol) of 0.5% ethanol. The data shown are the representative of each strain  
477 and condition; (C) crystal violet staining of biofilms from wild type,  $\Delta csrA$  mutant,  $\Delta csrA$  mutant  
478 with pMMB (empty vector), or  $\Delta csrA$  mutant with pAB2750; and (D) catalase activity of wild type,  
479  $\Delta csrA$  mutant,  $\Delta csrA$  mutant with pMMB (empty vector), or  $\Delta csrA$  mutant with pAB2750.

480

481 **Figure 4.** *A. baumannii* genes important for desiccation tolerance. (A) Genes (B) Desiccation  
482 tolerance of mutants at 2% RH. The cell number represents the total number of viable cells

483 recovered from each membrane. The data are the average of three or more biological  
484 replicates, and standard deviations are shown as the error bar.

485

486 **Figure 5.** Effect of expression of *ABUW\_2433* (red bar) or *ABUW\_2337* (blue bar) gene *in trans*  
487 on desiccation tolerance *A. baumannii* (A) ATCC17978 and (B) ATCC19606 after 0 days  
488 (control) and 6 days of desiccation at 2% RH. Empty vector (pMMB, black bar) was used as a  
489 control. The data are the average of three or more biological replicates, and standard deviations  
490 are shown as the error bar.

491

492

493

## SUPPLEMENTAL MATERIAL

**Figure S1.** Desiccation tolerance of *A. baumannii* AB5075 cells from the log-phase and stationery-phase of growth. The cell number represents a total number of viable cells recovered from each membrane. The data are the averages of three or more biological replicates, and standard deviations are shown as error bars.

**Figure S2.** Desiccation tolerance of wild type (black symbol) and the transposon mutant pool (red symbol). The cell number represents a total number of viable cells recovered from each membrane. The data are the average of three (for wild type) or two (for transposon mutant pool) biological replicates, and standard deviations from wild-type data are shown as error bars.

**Figure S3.** Complementation of desiccation phenotypes of (A) *ABUW\_2433::Tn* and (B) *ABUW\_2437::Tn* after 0 days (control) and 6 days of desiccation at 2% RH. Empty vector (pMMB) was used as a control. The data are the average of three or more biological replicates, and standard deviations are shown as the error bars.

**Table S1.** Screening of desiccation sensitive mutant by Tn-seq.

**Table S2.** Mutants from the three-allele library tested for desiccation tolerance

**Table S3.** (A) Label-free protein quantification of wild type and the  $\Delta csrA$  mutant. (B) List of proteins up-regulated (ratio of  $\Delta csrA/WT \geq 2.5$  and  $\Delta csrA$  read count  $\geq 7.5$ ) in the  $\Delta csrA$  mutant compared to wild type. (C) List of proteins down-regulated (ratio of  $\Delta csrA/WT \leq 0.4$  and WT read count  $\geq 7.5$ ) in the  $\Delta csrA$  mutant compared to wild type.

**Table S4.** Validation of desiccation phenotype of transposon mutant derived from the  $\Delta csrA$  mutant proteomics analysis.

**Table S5.** Bacterial strains used in this study (A). Plasmids and primers used in this study (B).



494 REFERENCES

495

496 1. Magill SS, Edwards JR, Bamberg W, Beldavs ZG, Dumyati G, Kainer MA, Lynfield R,  
497 Maloney M, McAllister-Hollod L, Nadle J, Ray SM, Thompson DL, Wilson LE, Fridkin SK, Team  
498 EIPH-AI and AUPS. 2014. Multistate Point-Prevalence Survey of Health Care–Associated  
499 Infections. *New Engl J Medicine* 370:1198–1208.

500 2. Marchetti A, Rossiter R. 2013. Economic burden of healthcare-associated infection in US  
501 acute care hospitals: societal perspective. *J Med Econ* 16:1399–1404.

502 3. Datta R, Platt R, Yokoe DS, Huang SS. 2011. Environmental Cleaning Intervention and Risk  
503 of Acquiring Multidrug-Resistant Organisms From Prior Room Occupants. *Arch Intern Med*  
504 171:491–494.

505 4. Huang SS, Datta R, Platt R. 2006. Risk of Acquiring Antibiotic-Resistant Bacteria From Prior  
506 Room Occupants. *Arch Intern Med* 166:1945–1951.

507 5. Munoz-Price LS, Namias N, Cleary T, Fajardo-Aquino Y, DePascale D, Arheart KL, Rivera JI,  
508 Doi Y. 2013. *Acinetobacter baumannii*: Association between Environmental Contamination of  
509 Patient Rooms and Occupant Status. *Infect Control Hosp Epidemiology* 34:517–520.

510 6. Thom KA, Johnson JK, Lee MS, Harris AD. 2011. Environmental contamination because of  
511 multidrug-resistant *Acinetobacter baumannii* surrounding colonized or infected patients. *Am J*  
512 *Infect Control* 39:711–715.

513 7. Harding CM, Hennon SW, Feldman MF. 2018. Uncovering the mechanisms of *Acinetobacter*  
514 *baumannii* virulence. *Nat Rev Microbiol* 16:91–102.

515 8. Giannouli M, Antunes LC, Marchetti V, Triassi M, Visca P, Zarrilli R. 2013. Virulence-related  
516 traits of epidemic *Acinetobacter baumannii* strains belonging to the international clonal lineages  
517 I-III and to the emerging genotypes ST25 and ST78. *Bmc Infect Dis* 13:282.

518 9. Jawad A, Seifert H, Snelling AM, Heritage J, Hawkey PM. 1998. Survival of *Acinetobacter*  
519 *baumannii* on Dry Surfaces: Comparison of Outbreak and Sporadic Isolates. *J Clin Microbiol*  
520 36:1938–1941.

521 10. Antunes LCS, Imperi F, Carattoli A, Visca P. 2011. Deciphering the multifactorial nature of  
522 *Acinetobacter baumannii* pathogenicity. *Plos One* 6:e22674.

523 11. Wendt C, Dietze B, Dietz E, Rüden H. 1997. Survival of *Acinetobacter baumannii* on dry  
524 surfaces. *J Clin Microbiol* 35:1394–1397.

525 12. Lebre PH, Maayer PD, Cowan DA. 2017. Xerotolerant bacteria: surviving through a dry  
526 spell. *Nat Rev Microbiol* 15:285–296.

527 13. Potts M. 1994. Desiccation tolerance of prokaryotes. *Microbiol Rev* 58:755–805.

- 528 14. Gayoso CM, Mateos J, Méndez JA, Fernández-Puente P, Rumbo C, Tomás M, Ilarduya ÓM  
529 de, Bou G. 2013. Molecular Mechanisms Involved in the Response to Desiccation Stress and  
530 Persistence in *Acinetobacter baumannii*. *J Proteome Res* 13:460–476.
- 531 15. Espinal P, Marti S, Vila J. 2012. Effect of biofilm formation on the survival of *Acinetobacter*  
532 *baumannii* on dry surfaces. *J Hosp Infect* 80:56–60.
- 533 16. Orsinger-Jacobsen SJ, Patel SS, Vellozzi EM, Gialanella P, Nimrichter L, Miranda K,  
534 Martinez LR. 2013. Use of a stainless steel washer platform to study *Acinetobacter baumannii*  
535 adhesion and biofilm formation on abiotic surfaces. *Microbiology+* 159:2594–2604.
- 536 17. Wang X, Cole CG, DuPai CD, Davies BW. 2020. Protein Aggregation is Associated with  
537 *Acinetobacter baumannii* Desiccation Tolerance. *Microorg* 8:343.
- 538 18. Boll JM, Tucker AT, Klein DR, Beltran AM, Brodbelt JS, Davies BW, Trent MS. 2015.  
539 Reinforcing Lipid A Acylation on the Cell Surface of *Acinetobacter baumannii* Promotes Cationic  
540 Antimicrobial Peptide Resistance and Desiccation Survival. *Mbio* 6:e00478–15.
- 541 19. Aranda J, Bardina C, Beceiro A, Rumbo S, Cabral MP, Barbé J, Bou G. 2011. *Acinetobacter*  
542 *baumannii* RecA Protein in Repair of DNA Damage, Antimicrobial Resistance, General Stress  
543 Response, and Virulence. *J Bacteriol* 193:3740–3747.
- 544 20. Farrow JM, Wells G, Pesci EC. 2018. Desiccation tolerance in *Acinetobacter baumannii* is  
545 mediated by the two-component response regulator BfmR. *Plos One* 13:e0205638.
- 546 21. Farrow JM, Wells G, Palethorpe S, Adams MD, Pesci EC. 2020. CsrA supports both  
547 environmental persistence and host-associated growth of *Acinetobacter baumannii*. *Infect*  
548 *Immun* <https://doi.org/10.1128/iai.00259-20>.
- 549 22. Zeidler S, Müller V. 2019. The role of compatible solutes in desiccation resistance of  
550 *Acinetobacter baumannii*. *Microbiologyopen* 8:e00740.
- 551 23. Jacobs AC, Thompson MG, Black CC, Kessler JL, Clark LP, McQueary CN, Gancz HY,  
552 Corey BW, Moon JK, Si Y, Owen MT, Hallock JD, Kwak YI, Summers A, Li CZ, Rasko DA,  
553 Penwell WF, Honnold CL, Wise MC, Waterman PE, Lesho EP, Stewart RL, Actis LA, Palys TJ,  
554 Craft DW, Zurawski DV. 2014. AB5075, a Highly Virulent Isolate of *Acinetobacter baumannii*, as  
555 a Model Strain for the Evaluation of Pathogenesis and Antimicrobial Treatments. *Mbio* 5:e01076  
556 14.
- 557 24. Gallagher LA, Ramage E, Weiss EJ, Radey M, Hayden HS, Held KG, Huse HK, Zurawski  
558 DV, Brittnacher MJ, Manoil C. 2015. Resources for Genetic and Genomic Analysis of Emerging  
559 Pathogen *Acinetobacter baumannii*. *J Bacteriol* 197:2027–2035.
- 560 25. Chin CY, Tipton KA, Farokhyfar M, Burd EM, Weiss DS, Rather PN. 2018. A high-frequency  
561 phenotypic switch links bacterial virulence and environmental survival in *Acinetobacter*  
562 *baumannii*. *Nat Microbiol* 3:563–569.

- 563 26. Tipton KA, Chin C-Y, Farokhyfar M, Weiss DS, Rather PN. 2018. Role of capsule in  
564 resistance to disinfectants, host antimicrobials and desiccation in *Acinetobacter baumannii*.  
565 *Antimicrob Agents Ch* 62:AAC.01188-18.
- 566 27. Potts AH, Vakulskas CA, Pannuri A, Yakhnin H, Babitzke P, Romeo T. 2017. Global role of  
567 the bacterial post-transcriptional regulator CsrA revealed by integrated transcriptomics. *Nat*  
568 *Commun* 8:1596.
- 569 28. Vakulskas CA, Potts AH, Babitzke P, Ahmer BMM, Romeo T. 2015. Regulation of bacterial  
570 virulence by Csr (Rsm) systems. *Microbiol Mol Biol R* 79:193-224.
- 571 29. Romeo T, Vakulskas CA, Babitzke P. 2013. Post-transcriptional regulation on a global scale:  
572 form and function of Csr/Rsm systems. *Environ Microbiol* 15:313–324.
- 573 30. Sobrero PM, Valverde C. 2020. Comparative Genomics and Evolutionary Analysis of RNA-  
574 Binding Proteins of the CsrA Family in the Genus *Pseudomonas*. *Frontiers Mol Biosci* 7:127.
- 575 31. LeGrand K, Petersen S, Zheng Y, Liu KK, Ozturk G, Chen J-Y, Young GM. 2015. CsrA  
576 impacts survival of *Yersinia enterocolitica* by affecting a myriad of physiological activities. *Bmc*  
577 *Microbiol* 15:31.
- 578 32. Erdős G, Pajkos M, Dosztányi Z. 2021. IUPred3: prediction of protein disorder enhanced  
579 with unambiguous experimental annotation and visualization of evolutionary conservation.  
580 *Nucleic Acids Res* 49:gkab408-.
- 581 33. Elhosseiny NM, Amin MA, Yassin AS, Attia AS. 2015. *Acinetobacter baumannii* universal  
582 stress protein A plays a pivotal role in stress response and is essential for pneumonia and  
583 sepsis pathogenesis. *Int J Med Microbiol* 305:114–123.
- 584 34. Crowe JH, Oliver AE, Tablin F. 2002. Is There a Single Biochemical Adaptation to  
585 Anhydrobiosis? *Integr Comp Biol* 42:497–503.
- 586 35. Leslie SB, Israeli E, Lighthart B, Crowe JH, Crowe LM. 1995. Trehalose and sucrose protect  
587 both membranes and proteins in intact bacteria during drying. *Appl Environ Microb* 61:3592–7.
- 588 36. França MB, Panek AD, Eleutherio ECA. 2007. Oxidative stress and its effects during  
589 dehydration. *Comp Biochem Physiology Part Mol Integr Physiology* 146:621–631.
- 590 37. Soares NC, Cabral MP, Gayoso C, Mallo S, Rodriguez-Velo P, Fernández-Moreira E, Bou  
591 G. 2010. Associating Growth-Phase-Related Changes in the Proteome of *Acinetobacter*  
592 *baumannii* with Increased Resistance to Oxidative Stress. *J Proteome Res* 9:1951–1964.
- 593 38. Juttukonda LJ, Green ER, Lonergan ZR, Heffern MC, Chang CJ, Skaar EP. 2018.  
594 *Acinetobacter baumannii* OxyR regulates the transcriptional response to hydrogen peroxide.  
595 *Infect Immun* 87:IAI.00413-18.
- 596 39. Aravind L, Landsman D. 1998. AT-hook motifs identified in a wide variety of DNA-binding  
597 proteins. *Nucleic Acids Res* 26:4413–4421.

- 598 40. Su L, Deng Z, Leng F. 2020. The Mammalian High Mobility Group Protein AT-Hook 2  
599 (HMGA2): Biochemical and Biophysical Properties, and Its Association with Adipogenesis. *Int J*  
600 *Mol Sci* 21:3710.
- 601 41. Boothby TC, Tapia H, Brozena AH, Piskiewicz S, Smith AE, Giovannini I, Rebecchi L,  
602 Pielak GJ, Koshland D, Goldstein B. 2017. Tardigrades Use Intrinsically Disordered Proteins to  
603 Survive Desiccation. *Mol Cell* 65:975-984.e5.
- 604 42. Hesgrove C, Boothby TC. 2020. The biology of tardigrade disordered proteins in extreme  
605 stress tolerance. *Cell Commun Signal* 18:178.
- 606 43. Cohan MC, Pappu RV. 2020. Making the Case for Disordered Proteins and Biomolecular  
607 Condensates in Bacteria. *Trends Biochem Sci* 45:668–680.
- 608 44. Lapouge K, Schubert M, Allain FH-T, Haas D. 2008. Gac/Rsm signal transduction pathway  
609 of gamma-proteobacteria: from RNA recognition to regulation of social behaviour. *Mol Microbiol*  
610 67:241-253.
- 611 45. Cerqueira GM, Kostoulas X, Khoo C, Aibinu I, Qu Y, Traven A, Peleg AY. 2014. A global  
612 virulence regulator in *Acinetobacter baumannii* and its control of the phenylacetic acid catabolic  
613 pathway. *J Infect Dis* 210:46-55.
- 614 46. Weiss A, Broach WH, Lee MC, Shaw LN. 2016. Towards the complete small RNome of  
615 *Acinetobacter baumannii*. *Microb Genom* 2:e000045.
- 616 47. Pourciau C, Lai Y-J, Gorelik M, Babitzke P, Romeo T. 2020. Diverse Mechanisms and  
617 Circuitry for Global Regulation by the RNA-Binding Protein CsrA. *Front Microbiol* 11:601352.
- 618 48. Romeo T, Babitzke P. 2018. Global Regulation by CsrA and Its RNA Antagonists. *Microbiol*  
619 *Spectr* 6.
- 620 49. Renda A, Poly S, Lai Y-J, Pannuri A, Yakhnin H, Potts AH, Bevilacqua PC, Romeo T,  
621 Babitzke P. 2020. CsrA-Mediated Translational Activation of *ymdA* Expression in *Escherichia*  
622 *coli*. *Mbio* 11.
- 623 50. Maurer CK, Fruth M, Empting M, Avrutina O, Homann J, Nadmid S, Gorges J, Herrmann J,  
624 Kazmaier U, Dersch P, Müller R, Hartmann RW. 2016. Discovery of the first small-molecule  
625 CsrRNA interaction inhibitors using biophysical screening technologies. *Future Med Chem*  
626 8:931–947.
- 627 51. Neidhardt FC, Bloch PL, Smith DF. 1974. Culture Medium for Enterobacteria. *J Bacteriol*  
628 119:736–747.
- 629 52. Klein BA, Tenorio EL, Lazinski DW, Camilli A, Duncan MJ, Hu LT. 2012. Identification of  
630 essential genes of the periodontal pathogen *Porphyromonas gingivalis*. *Bmc Genomics* 13:578.
- 631 53. Horton RM, Ho SN, Pullen JK, Hunt HD, Cai Z, Pease LR. 1993. Gene splicing by overlap  
632 extension. *Methods in enzymology* 217:270-279.

- 633 54. Eng JK, Jahan TA, Hoopmann MR. 2013. Comet: An open-source MS/MS sequence  
634 database search tool. *Proteomics* 13:22–24.
- 635 55. Keller A, Nesvizhskii AI, Kolker E, Aebersold R. 2002. Empirical Statistical Model To  
636 Estimate the Accuracy of Peptide Identifications Made by MS/MS and Database Search. *Anal*  
637 *Chem* 74:5383–5392.
- 638 56. Nesvizhskii AI, Keller A, Kolker E, Aebersold R. 2003. A Statistical Model for Identifying  
639 Proteins by Tandem Mass Spectrometry. *Anal Chem* 75:4646–4658.
- 640 57. Fermin D, Basrur V, Yocum AK, Nesvizhskii AI. 2011. Abacus: A computational tool for  
641 extracting and pre-processing spectral count data for label-free quantitative proteomic analysis.  
642 *Proteomics* 11:1340–1345.
- 643 58. Iwase T, Tajima A, Sugimoto S, Okuda K, Hironaka I, Kamata Y, Takada K, Mizunoe Y.  
644 2013. A Simple Assay for Measuring Catalase Activity: A Visual Approach. *Sci Rep-uk* 3:3081.

Table 1. *Acinetobacter baumannii* strain AB5075 genes identified as important for desiccation tolerance

| Gene        | Survival ratio of mutant (day 0/day 6 desiccation) <sup>a</sup> | Gene name                | Gene annotation                              | Ratio of Tn insertions from Tn-seq screen (day 0/day 6 desiccation) | Protein abundance (ratio WT/ $\Delta$ csrA) |
|-------------|-----------------------------------------------------------------|--------------------------|----------------------------------------------|---------------------------------------------------------------------|---------------------------------------------|
| AB5075 (WT) | 17                                                              |                          |                                              |                                                                     |                                             |
| ABUW_2389   | 32                                                              | <i>cioA</i>              | cytochrome bd ubiquinol oxidase, subunit I   | 12.1                                                                | ND <sup>b</sup>                             |
| ABUW_2433   | 2,102                                                           |                          | KGG domain-containing protein                | 6.9                                                                 | 4.3                                         |
| ABUW_2436   | 128                                                             | <i>katE</i>              | catalase                                     | 1.3                                                                 | 3.2                                         |
| ABUW_2437   | 2,540                                                           |                          | Iron-containing redox protein                | 11.0                                                                | 10.5                                        |
| ABUW_2639   | 103                                                             |                          | universal stress protein family              | 19.4                                                                | 4.4                                         |
| ABUW_2724   | 43                                                              |                          | hypothetical protein                         | 0.6                                                                 | 2.4                                         |
| ABUW_2750   | 43                                                              | <i>csrA</i> <sup>c</sup> | carbon storage regulator                     | 19.9                                                                | 8.5                                         |
| ABUW_2954   | 68                                                              |                          | putative transcriptional regulator           | 13.6                                                                | ND                                          |
| ABUW_3123   | 32                                                              | <i>otsA</i>              | trehalose-6-phosphate synthase               | 1.3                                                                 | 10.5                                        |
| ABUW_3837   | 44                                                              | <i>ampD</i>              | N-acetylmuramoyl-L-alanine amidase, family 2 | 12.7                                                                | 0.5                                         |

<sup>a</sup> All strains were grown in TY broth to the stationary phase of growth prior to being desiccated

<sup>b</sup> ND, protein not detected

<sup>c</sup> The survival ratio (day 0/ day 6 desiccation) of a  $\Delta$ *csrA* mutant grown in M9/succinate was 133,750. The survival ratio of WT grown in M9/succinate was 276.

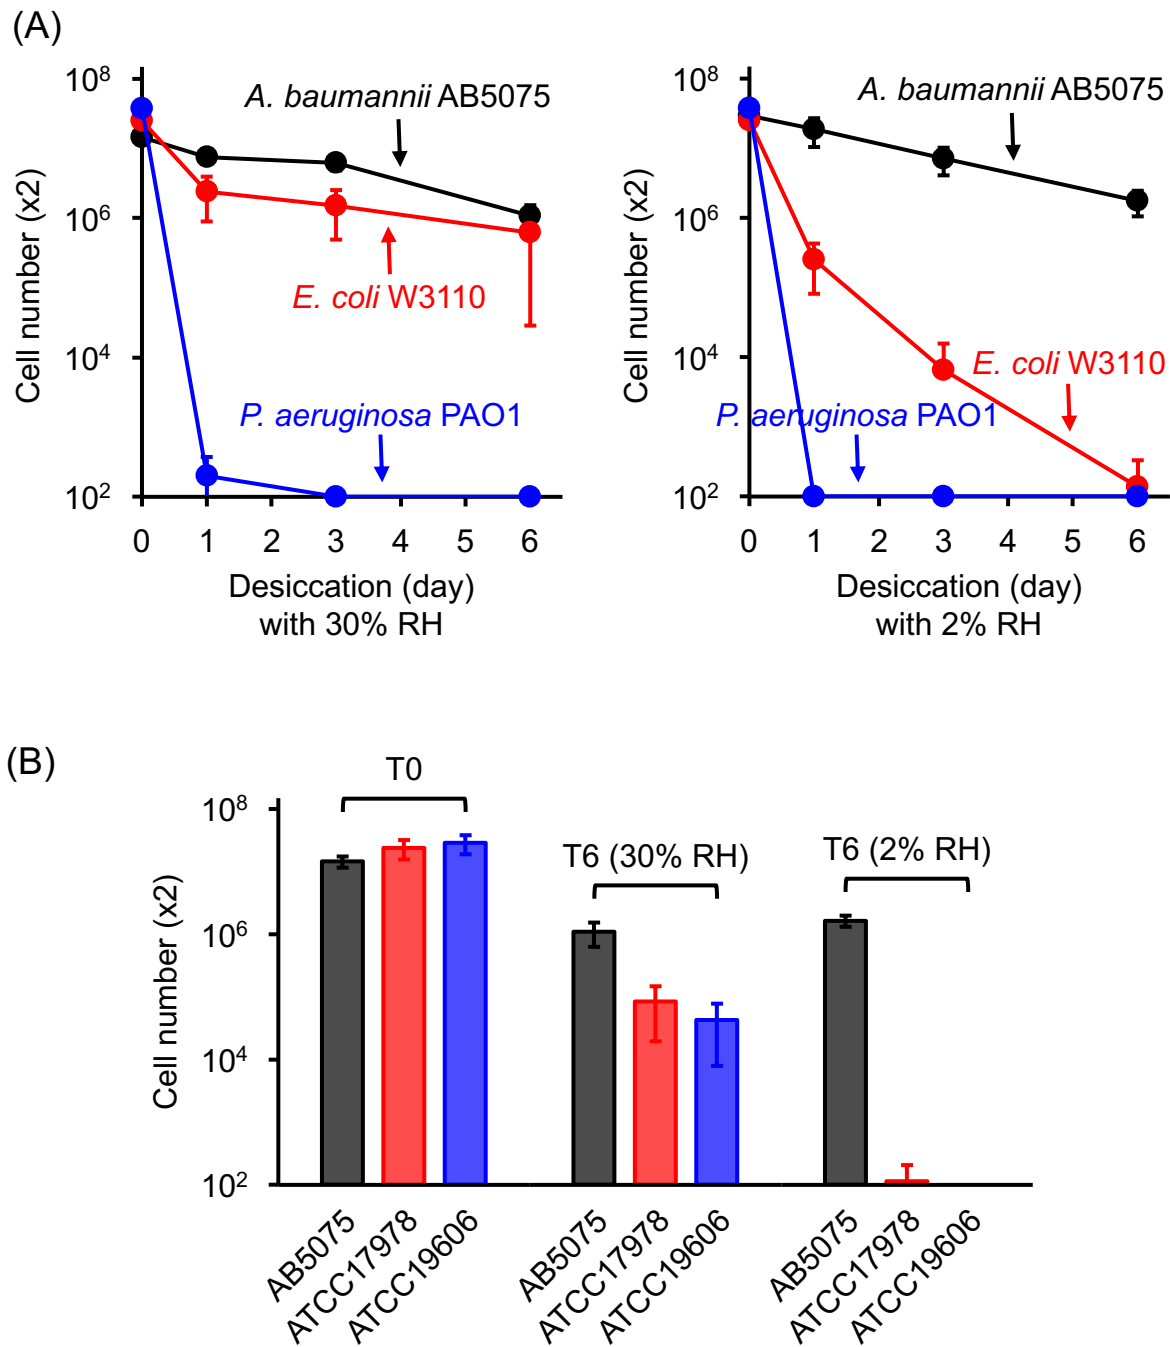

**Figure 1.** Desiccation tolerance of *A. baumannii*. (A) Comparison of AB5075, *E. coli* W3110, and *P. aeruginosa* PAO1 at 30% RH or 2% RH. (B) Desiccation tolerance of *A. baumannii* strains AB5075, ATCC17978, and ATCC19606 after 0 days (control) and 6 days of desiccation at 30% RH or 2% RH. The cell numbers represent the total number of viable cells recovered from each membrane. The data are the average of three or more biological replicates, and standard deviations are shown as the error bars.



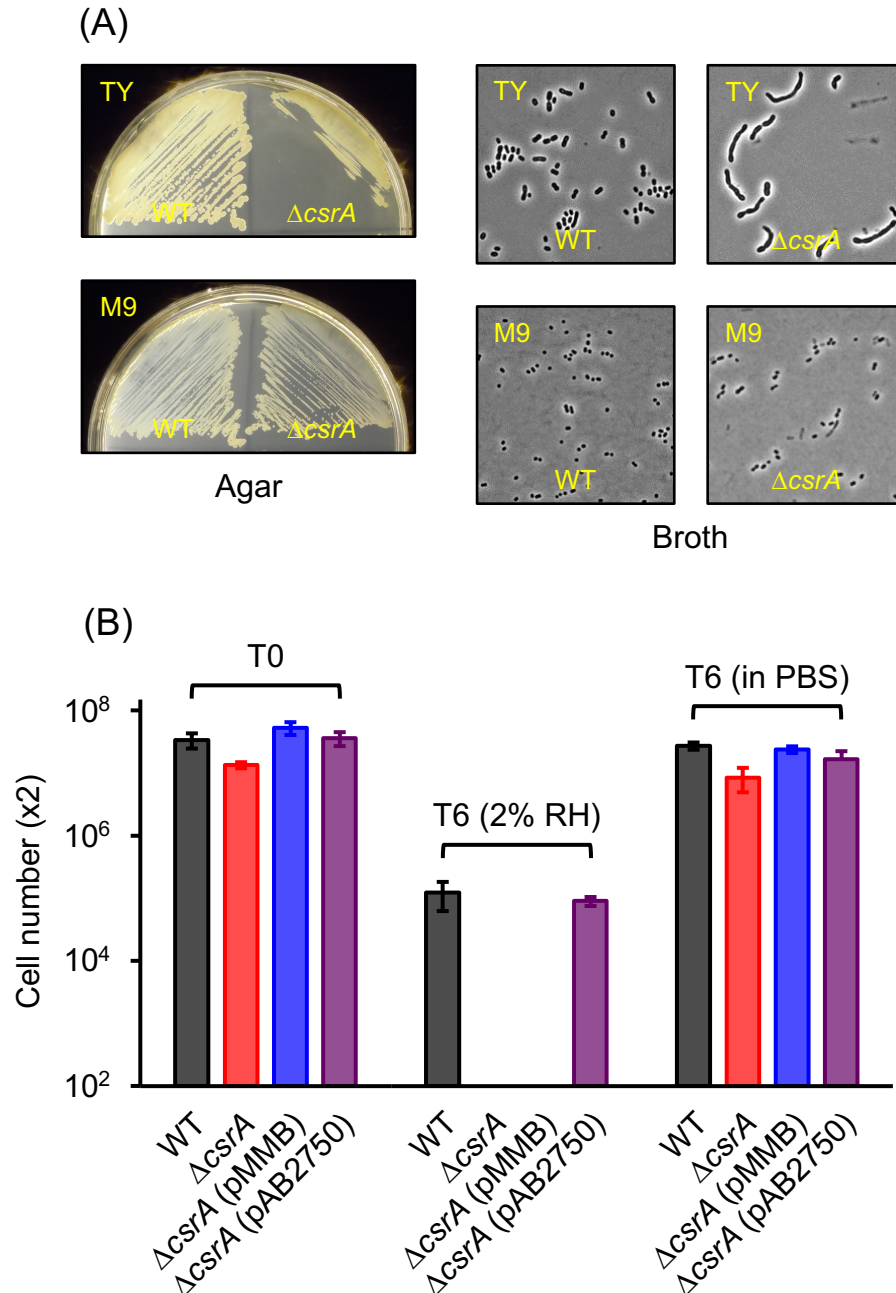

**Figure 2.** Growth and desiccation tolerance of the  $\Delta csrA$  mutant (A) Comparison of wild type (WT) and the  $\Delta csrA$  mutant on TY and M9/succinate agar and in TY and M9/succinate broth. (B) Desiccation tolerance of WT,  $\Delta csrA$  mutant,  $\Delta csrA$  mutant with pMMB (empty vector), and  $\Delta csrA$  mutant with *csrA* expressed in trans (pAB2750) at day 0 and at day 6 of desiccation at 2% RH or at 6 days in PBS. The cell number represents the total number of viable cells recovered from each membrane. The data are the average of three or more biological replicates, and standard deviations are shown as the error bar.



(A)

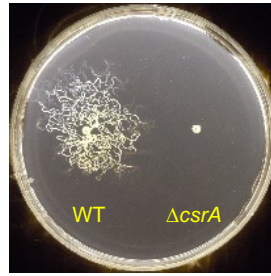

(B)

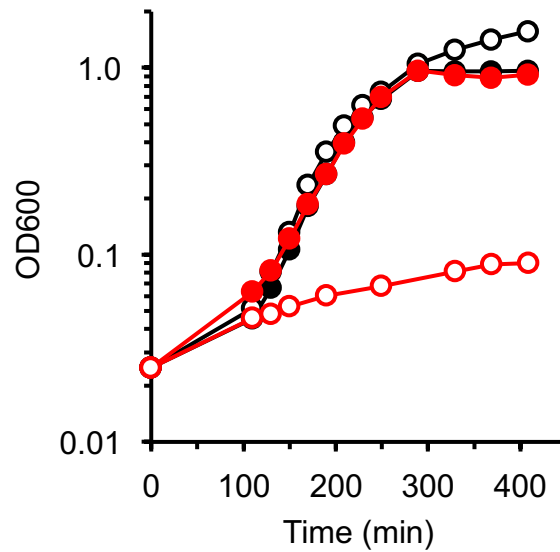

(C)

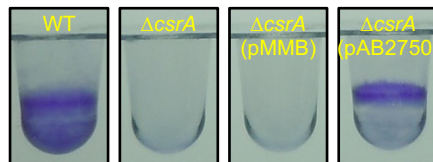

(D)

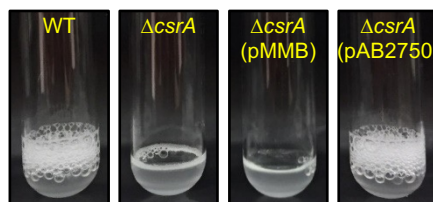

**Figure 3.** Phenotypes of the  $\Delta csrA$  mutant: (A) twitching motility; (B) growth of wild type (black symbol) or the  $\Delta csrA$  mutant (red symbol) in M9/succinate in the absence (closed symbol) or presence (open symbol) of 0.5% ethanol. The data shown are the representative of each strain and condition; (C) crystal violet staining of biofilms from wild type,  $\Delta csrA$  mutant,  $\Delta csrA$  mutant with pMMB (empty vector), or  $\Delta csrA$  mutant with pAB2750; and (D) catalase activity of wild type,  $\Delta csrA$  mutant,  $\Delta csrA$  mutant with pMMB (empty vector), or  $\Delta csrA$  mutant with pAB2750.

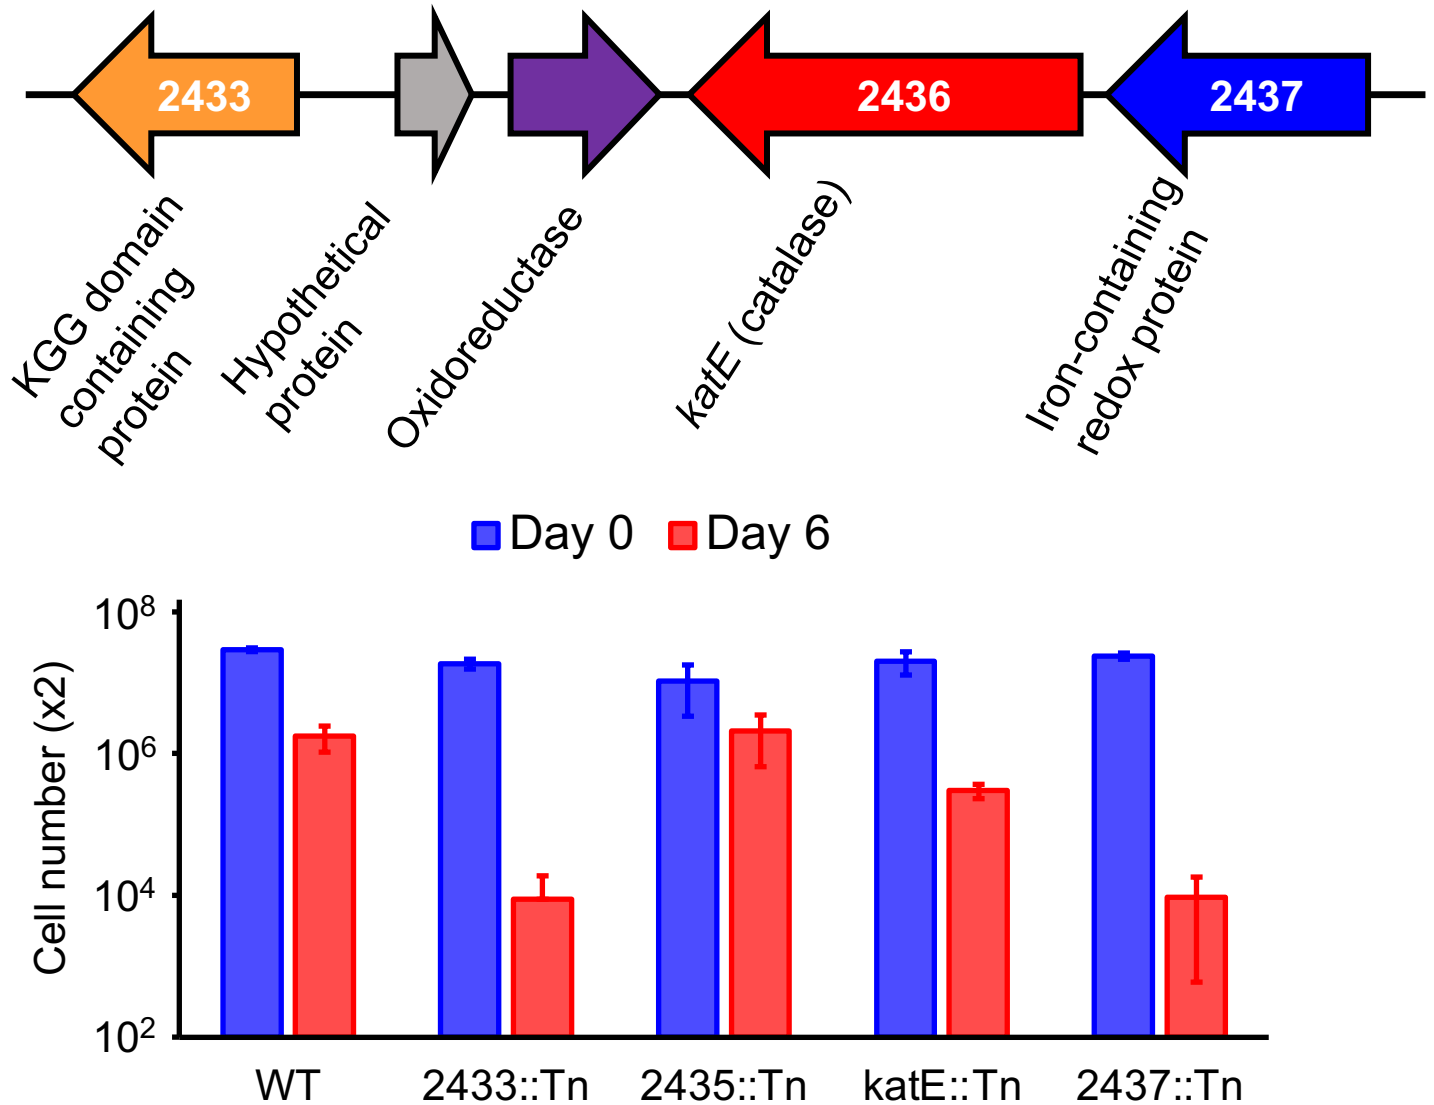

Figure 4. *A. baumannii* genes important for desiccation tolerance. (A) Genes (B) Desiccation tolerance of mutants at 2% RH. The cell number represents the total number of viable cells recovered from each membrane. The data are the average of three or more biological replicates, and standard deviations are shown as the error bar.

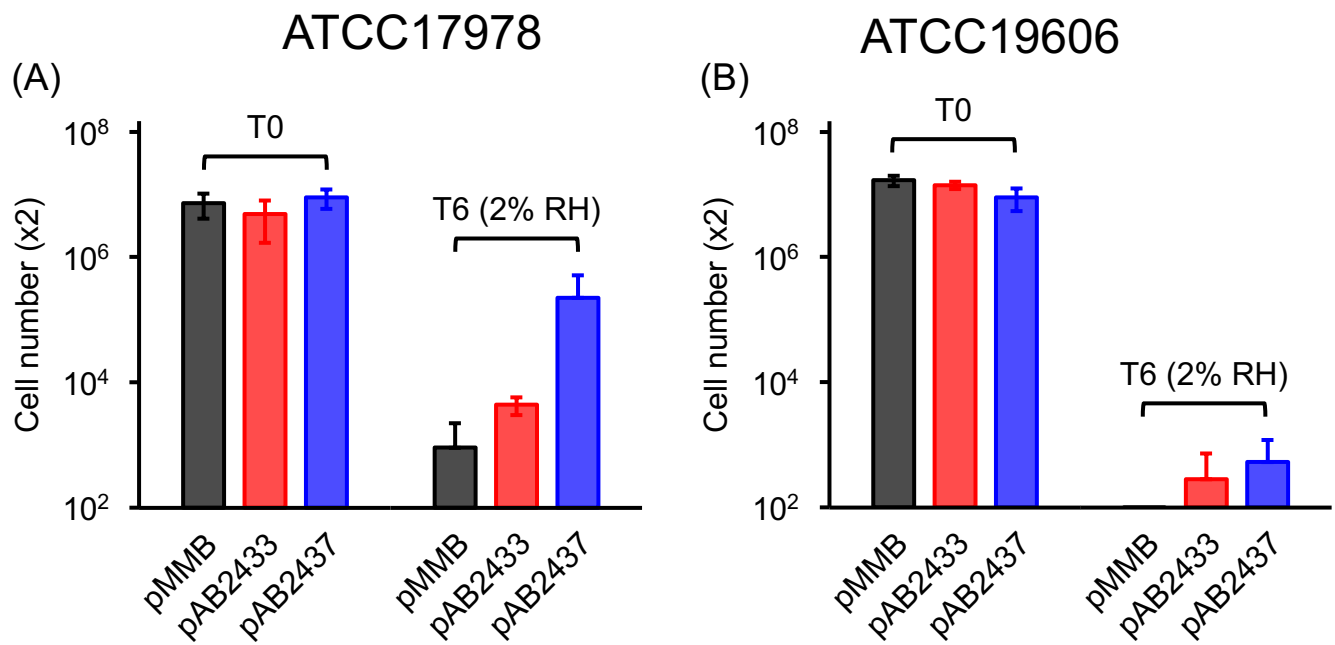

**Figure 5.** Effect of expression of ABUW\_2433 (red bar) or ABUW\_2337 (blue bar) gene *in trans* desiccation tolerance *A. baumannii* (A) ATCC17978 and (B) ATCC19606 after 0 days (control) and 6 days of desiccation at 2% RH. Empty vector (pMMB, black bar) was used as a control. The data are the average of three or more biological replicates, and standard deviations are shown as the error bar.

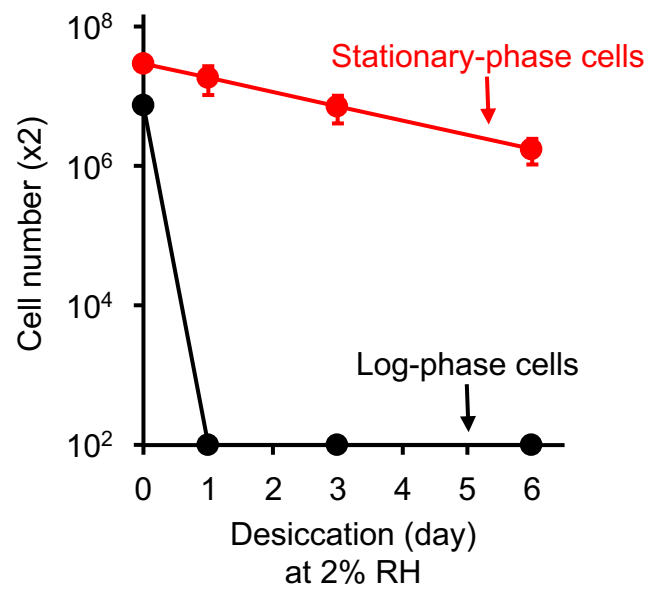

**Supplementary Figure 1.** Desiccation tolerance of *A. baumannii* AB5075 cells from the log-phase and stationary-phase of growth. The cell number represents a total number of viable cells recovered from each membrane. The data are the averages of three or more biological replicates, and standard deviations are shown as error bars.

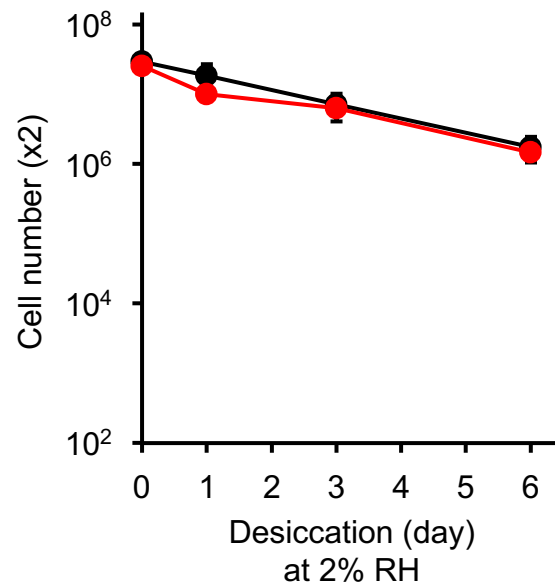

**Supplementary Figure 2.** Desiccation tolerance of wild type (black symbol) and the transposon mutant pool (red symbol). The cell number represents a total number of viable cells recovered from each membrane. The data are the average of three (for wild type) or two (for transposon mutant pool) biological replicates, and standard deviations from wild-type data are shown as error bars.

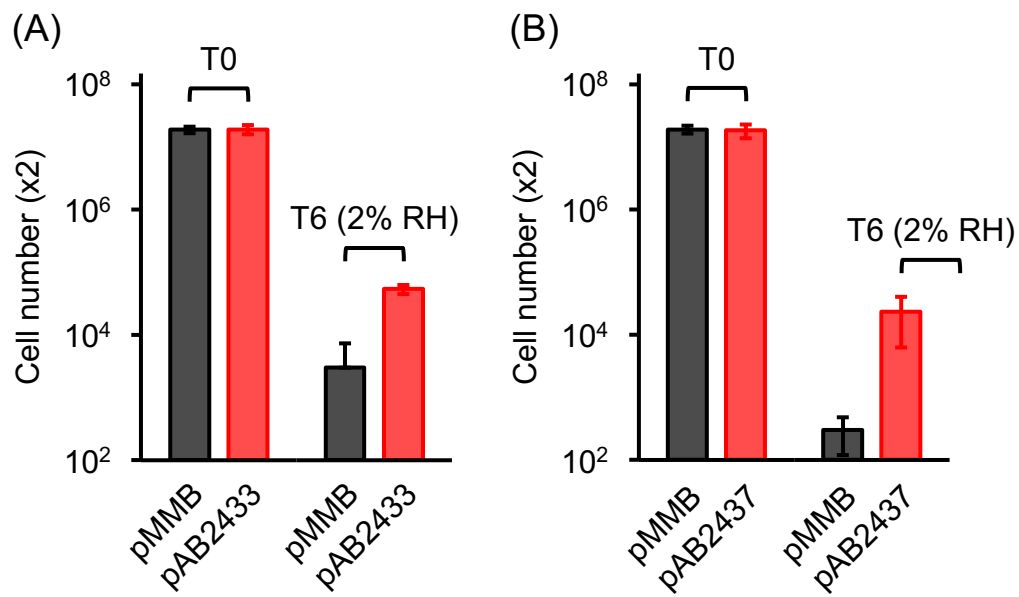

**Supplementary Figure 3.** Complementation of desiccation phenotypes of (A) ABUW\_2433::Tn and (B) ABUW\_2437::Tn after 0 days (control) and 6 days of desiccation at 2% RH. Empty vector (pMMB) was used as a control. The data are the average of three or more biological replicates, and standard deviations are shown as the error bars.
