# **CsrA-controlled proteins reveal new dimensions of *Acinetobacter baumannii* desiccation tolerance**

Yasuhiro Oda<sup>1</sup>, Madelyn M. Shapiro<sup>2</sup>, Nathan M. Lewis<sup>3</sup>, Xuefei Zhong<sup>4</sup>, Holly K. Huse<sup>5</sup>, Weizhi Zhong<sup>1</sup>, James E. Bruce<sup>6</sup>, Colin Manoil<sup>6</sup>, and Caroline S. Harwood<sup>1</sup>

<sup>1</sup>Department of Microbiology, University of Washington, Seattle, Washington, 98195-7735 USA'

<sup>2</sup> Seattle Children's Research Institute, Seattle, Washington, 98109 USA

<sup>3</sup> Department of Plant and Microbial Biology. University of Minnesota, St. Paul, MN. 55108 USA

<sup>4</sup> Analytical Chemistry Group. Regeneron Pharmaceuticals, Tarrytown, NY 10591 USA

<sup>5</sup> Department of Pathology. Harbor-UCLA Medical Center, Torrance, CA 90502-2059 USA

<sup>6</sup>Department of Genome Sciences, University of Washington, Seattle, Washington, 98195-5065 USA

Address correspondence to Caroline S. Harwood, [csh5@uw.edu](mailto:csh5@uw.edu)

Running title: *Acinetobacter baumannii* desiccation tolerance

Key words: *Acinetobacter baumannii*, desiccation, CsrA, intrinsically disordered proteins

1 **ABSTRACT**

2 Hospital environments are excellent reservoirs for the opportunistic pathogen *Acinetobacter*  
3 *baumannii* in part because it is exceptionally tolerant to desiccation. We found that relative to  
4 other *A. baumannii* strains, the virulent strain AB5075 was strikingly desiccation resistant at 2%  
5 relative humidity (RH), suggesting that it's a good model for studies of the functional basis of  
6 this trait. Consistent with results from other *A. baumannii* strains at 30% RH, we found the  
7 global post-transcriptional regulator CsrA to be critically important for desiccation tolerance of  
8 AB5075 at 2% RH. To identify CsrA-controlled proteins that may contribute to desiccation  
9 tolerance we used proteomics to identify proteins that were differentially present in wild type and  
10 *csrA* mutant cells. Subsequent mutant analysis revealed nine genes that were required for wild  
11 type levels of desiccation tolerance, five of which had modest phenotypes. Catalase and a  
12 universal stress protein gene were moderately important for desiccation tolerance and two  
13 genes of unknown function had very strong desiccation phenotypes. The predicted amino acid  
14 sequence of one of these genes predicts an intrinsically disordered protein. This category of  
15 proteins is widespread in eukaryotes but less so in prokaryotes. Our results suggest there may  
16 be mechanisms responsible for desiccation tolerance that have not previously been explored in  
17 bacteria.

18

19 **IMPORTANCE**

20 *Acinetobacter baumannii* is commonly found in terrestrial environments but can cause  
21 nosocomial infections in very sick patients. A factor that contributes to the prevalence of *A.*  
22 *baumannii* in hospital settings is that it is intrinsically resistant to dry conditions. Here, we  
23 established the virulent strain *A. baumannii* AB5075 as a model for studies of desiccation  
24 tolerance at very low relative humidity. Our results show that this trait depends on two proteins  
25 of unknown function, one of which is predicted to be an intrinsically disordered protein. This  
26 category of protein is critical for the small animals named tardigrades to survive desiccation. Our

27 results suggest that *A. baumannii* may have novel strategies to survive desiccation that have  
28 not previously been seen in bacteria.

29

## 30 INTRODUCTION

31 Hospital-acquired infections are an important healthcare concern and economic burden (1, 2)  
32 and environmental persistence plays a critical role in the transmission of bacteria that cause  
33 these infections (3–6). One such bacterium is *Acinetobacter baumannii*, an opportunistic  
34 pathogen that infects very sick patients. It is responsible for about 2% of nosocomial infections  
35 in the United States and Europe and the frequencies are higher in the rest of the world. *A.*  
36 *baumannii* is especially problematic because on a global basis, about 45% of isolates are multi-  
37 drug resistant (7). A factor that contributes to the prevalence of *A. baumannii* in hospital settings  
38 is desiccation tolerance. *A. baumannii* can survive in a desiccated state on inanimate dry  
39 surfaces for days to several months (8–10). These surfaces include materials that are often  
40 encountered in the hospital, such as polyvinyl chloride, rubber, and stainless steel (11) .

41

42 When desiccated, bacteria must respond to diverse stresses that include accumulation of  
43 reactive oxygen species, loss of cytoplasmic volume, and loss of cell membrane integrity (12,  
44 13). Proteomics analysis of *A. baumannii* showed that desiccated cells had higher levels of  
45 proteins involved in protein stabilization, antimicrobial resistance, and reactive oxygen species  
46 detoxification (14). Attributes of *A. baumannii*, that have been shown to be associated with  
47 desiccation tolerance include biofilm formation (15, 16) and protein aggregation (17). LpxM<sub>AB</sub>-  
48 dependent acetylation of lipid A is essential for survival of *A. baumannii* ATCC17978 at 40% RH  
49 (18), and a *recA* mutant of ATCC17978, defective in DNA repair, had a pleiotropic phenotype,  
50 including a defect in desiccation tolerance (19). *katE*, encoding catalase also contributes to  
51 desiccation tolerance (20). Despite these observations, the number of genes identified in *A.*  
52 *baumannii* that are specifically involved in desiccation tolerance is small. This could be because

53 *A. baumannii* cells have evolved modified cell structures that are both essential for viability and  
54 important for desiccation tolerance. The genetic basis for this would be difficult to uncover in  
55 mutant screens. It is also possible that the conditions of desiccation used, typically 30% RH in  
56 studies to date, were not sufficiently severe to allow identification of some desiccation tolerance  
57 genes.

58  
59 With the goal of identifying new desiccation tolerance genes, we established *A. baumannii* strain  
60 AB5075 as a model for studying desiccation tolerance under severe conditions of 2% RH. We  
61 then followed up on a recent report showing that *csrA*, which encodes a global post-  
62 transcriptional regulator, is important for desiccation tolerance (21) and identified nine CsrA-  
63 controlled proteins that confer desiccation tolerance on AB5075 at 2% RH. One of these has  
64 predicted properties that suggest new dimensions of desiccation tolerance.

65

## 66 **RESULTS**

67 **Desiccation assay.** Previous studies have shown that *A. baumannii* can survive in a desiccated  
68 state for days to several months (8–11, 20). For these and other desiccation studies,  
69 investigators worked with a variety of strains and usually incubated cells at either 30% RH or in  
70 room air, which varied between 25 and 61% RH in one study (20). These differences can make  
71 it difficult to compare desiccation phenotypes between studies. Thus we thought it important to  
72 establish a robust desiccation assay that reduces experimental variables like choice of strains,  
73 drying times, and RH during desiccation, using a highly desiccation resistant strain.

74

75 Following from previous reports, saturated calcium chloride hexahydrate solution placed in a  
76 sealed plastic Snapware container caused the RH inside the container to rapidly equilibrate to  
77 30% (9). We found that use of DRIERITE instead of calcium chloride, resulted in an RH of 2%.  
78 To test desiccation tolerance under different conditions, we grew bacteria to a desired density in

79 Trypticase Soy Broth (TSB), harvested them, washed them twice, and resuspended them in  
80 phosphate buffer to a final OD<sub>600</sub> of 1. Drops of cell suspension were placed on polycarbonate  
81 membranes and filtered to allow for rapid drying. The membranes were then placed in  
82 uncapped 15 ml conical centrifuge tubes and incubated in desiccation containers. After various  
83 periods of incubation, buffer was added to each centrifuge tube followed by 5 min of shaking on  
84 a rotary shaker. Viable cell numbers were then determined by plating on TSB agar. To control  
85 for the stress of filtration we did viable counts immediately following filtration and took this as our  
86 “day 0” time point.

87

88 **Relative desiccation tolerance of *A. baumannii* strains.** As shown in Fig 1A, *A. baumannii*  
89 strain AB5075 and *Escherichia coli* strain W3100 each survived desiccation at 30% RH far  
90 better than *Pseudomonas aeruginosa* strain PAO1. However at 2% RH, *A. baumannii* survived  
91 far better than either *E. coli* or *P. aeruginosa*. As has been reported (20, 22), we found that *A.*  
92 *baumannii* stationary phase cells were much more tolerant to desiccation than actively growing  
93 cells (Fig. S1) and so we routinely used stationary phase cells in our desiccation assays. We  
94 compared the desiccation tolerance of AB5075 to two additional frequently used laboratory  
95 strains of *A. baumannii*, ATCC17978 and ATCC19606. We found that AB5075 was strikingly  
96 more resistant than the others at 2% RH and somewhat more resistant at 30% (Fig. 1B).  
97 Given the strength of its phenotype, these findings indicate that AB5075 is a good model for  
98 studying desiccation tolerance. This strain was isolated from a surgical wound, is multidrug  
99 resistant and is highly virulent in an animal model (23). A comprehensive ordered mutant library  
100 of AB5075 is available that has two to three sequenced Tn insertions in each gene and is called  
101 the three-allele library (24).

102

103 **CsrA is critical for desiccation tolerance.** We examined the contribution of the post-  
104 transcriptional regulator CsrA to desiccation tolerance of AB5075 by constructing a *csrA*

105 deletion mutant ( $\Delta csrA$ ). We found that the mutant grew poorly on TY agar and had an  
106 elongated cell morphology when grown in TY broth (Fig. 2A). On agar plates, large colonies  
107 frequently appeared on a background of poor growth, likely due to occurrence of second site  
108 suppressor mutations in the  $\Delta csrA$  strain. The  $\Delta csrA$  strain was also defective in growth on other  
109 nutrient-rich media, including LB broth, nutrient broth, and TSB broth. A similar sensitivity to  
110 growth in complex media was reported by Farrow et al. for several *A. baumannii* strains  
111 including strain AB5075 (21). In agreement with Farrow et al., a  $\Delta csrA$  mutant grew as the wild  
112 type in defined medium, in our case, M9 minimal medium with 10 mM succinate as a sole  
113 carbon source (M9/succinate), and it had close to a wild type cell morphology (Fig 2A). A  
114 *Yersinia enterocolitica csrA* mutant, has a growth defect in LB due to the presence of 90 mM of  
115 NaCl (25). However, the *A. baumannii*  $\Delta csrA$  mutant was not sensitive to this level of NaCl. In  
116 fact, the mutant grew in M9/succinate supplemented with up to 100 mM of NaCl without a  
117 significant reduction of growth compared to the wild type.

118

119 When desiccated after growth in M9/succinate to stationary phase, the AB5075  $\Delta csrA$  mutant  
120 lost almost all viability over 6 days (Fig. 2B and Table 1). The desiccation phenotype was  
121 complemented by expressing *csrA* *in trans*.  $\Delta csrA$  mutant cells incubated for 6 days after being  
122 filtered and resuspended in PBS remained fully viable (Fig 2B).

123

124 **CsrA affects multiple cellular processes in *A. baumannii*.** To identify genes whose  
125 translation might be regulated by CsrA, we compared the proteomes of wild-type and  $\Delta csrA$   
126 cells (Table S2A). There were 97 proteins present at higher levels in the  $\Delta csrA$  mutant  
127 compared to the wild type (ratio of  $\Delta csrA$ /WT  $\geq 2.5$ , Table S2B). Among these were proteins for  
128 type IV pilus assembly, synthesis of the siderophore ferric acinetobactin, and a  
129 glutamate/aspartate transporter. The  $\Delta csrA$  mutant also had elevated levels of enzymes for the

130 catabolism of hydroxycinnamates, phenylacetate and quinate. Levels of an alcohol  
131 dehydrogenase (ABUW\_1621) and an aldehyde dehydrogenase (ABUW\_1624) were also  
132 elevated. The  $\Delta csrA$  mutant was defective in pilus-mediated twitching motility as assessed by  
133 movement across a soft-agar plate (Fig. 3A). The mutant also had a severe growth defect when  
134 grown on succinate in the presence of ethanol (Fig. 3B). One possible explanation for this is that  
135 the  $csrA$  mutant metabolized ethanol to form toxic acetaldehyde to levels that slowed growth.

136  
137 There were 106 proteins present in lower amounts in the  $\Delta csrA$  mutant compared to the wild  
138 type (ratio of WT/ $\Delta csrA \geq 2.5$ , Table S2C). A large proportion of these (39%) are annotated as  
139 hypothetical proteins. Several membrane proteins, and proteins annotated as involved in  $\beta$ -  
140 lactam antibiotic resistance (ABUW\_1194, 2619, and 3497), trehalose synthesis (ABUW\_3123)  
141 and possibly biofilm formation (ABUW\_0916) were in lower abundance in the  $\Delta csrA$  mutant  
142 compared to wild type. As reported previously, a  $\Delta csrA$  mutant did not form biofilms (21). This  
143 phenotype was complemented by expressing the  $csrA$  gene *in trans* (Fig. 3C). The  $\Delta csrA$   
144 proteome profile also suggested that CsrA is involved in promoting the expression of proteins  
145 involved in oxidative stress, including peroxidase (ABUW\_0628) and catalase (*katE*,  
146 ABUW\_2436). Indeed the  $\Delta csrA$  mutant lacked detectable catalase activity (Fig. 3D).

147  
148 **Genes important for desiccation tolerance in *A. baumannii* AB5075.** We took advantage  
149 of the three-allele transposon library to test how important some of the gene transcripts that  
150 were likely to be controlled by CsrA were for desiccation tolerance (Tables 1 and S1). When  
151 possible, we tested two different transposon mutants (transposon insertions in different  
152 positions of the gene) for each gene. *A. baumannii* AB5075 produces opaque and translucent  
153 colony variants that interconvert at high frequency and reflect changes in the thickness of  
154 capsular exopolysaccharide (26). AB5075 cells with decreased capsule production are about

155 2.5-fold more sensitive to desiccation (27). Here, we used only opaque colonies of AB5075 and  
156 its mutant derivatives in our desiccation assays.

157

158 We found that *katE* and *ABUW\_2639* mutants were about 5-fold more sensitive to desiccation  
159 than the wild type, whereas *ABUW\_2433* and *ABUW\_2437* mutants were greater than 100-fold  
160 more sensitive to desiccation than the wild type (Table 1, Fig 4). The phenotypes of  
161 *ABUW\_2433* and *ABUW\_2437* mutants could be complemented (Fig S2). The *ABUW\_2433*  
162 protein has 411 amino acids and is annotated as a KGG domain-containing protein. The KGG  
163 domain comprises a small region in the N-terminus of the protein and the remainder of the  
164 protein is annotated by InterPro as a disordered region that includes a series of AT\_hook DNA  
165 binding motifs (SMART SM00384). The full length *ABUW\_2433* sequence was predicted to be  
166 intrinsically unstructured when queried with the IUPred3 tool (<https://iupred.elte.hu>) (28).

167 *ABUW\_2437* is annotated as an iron-containing redox enzyme or a heme-oxygenase -like  
168 protein (Fig 4). The predicted *ABUW\_2437* transcript has traits characteristic of a target of CsrA  
169 post-transcriptional regulation. The DNA sequence predicts a relatively long 5' untranslated  
170 region (316 bp) and there is a predicted CsrA binding motif (GGA) in the ribosome binding site  
171 of the transcript. *ABUW\_2639* is annotated as belonging to a universal stress protein A family. It  
172 has been shown to protect *A. baumannii* ATCC17987 from oxidative stress of hydrogen  
173 peroxide (29).

174

175 We wondered if *ABUW\_2433* and *ABUW\_2437* might play a role in promoting desiccation  
176 tolerance of the two *A. baumannii* strains, ATCC17978 and ATCC19606, that do not survive  
177 well at 2% RH (Fig 1B). ATCC19606 has the gene region shown in Fig 4 intact, but the gene  
178 that is homologous to *ABUW\_2433*, encoding the KGG domain-containing protein, is annotated  
179 as a pseudogene. ATCC17978 appears to be missing a gene homologous to *ABUW\_2433*.  
180 However it has contiguous *katE* and iron-containing redox protein genes (*A1S\_1386* and



181 A1S\_1385). Expression of the two AB5075 genes *in trans* improved the survival of the two  
182 ATCC strains at 2% RH (Fig 5), providing evidence that ABUW\_2433 and ABUW\_2437 are  
183 generally important for desiccation tolerance.

184

185 **Other possible desiccation tolerance genes.** As shown in Table 1, we identified an  
186 additional six genes that are likely regulated by CsrA, that may have a small role in desiccation  
187 tolerance. *ABUW\_0916*, encoding a biofilm-associated protein and *otsA*, encoding trehalose-6-  
188 phosphate synthase, are the only two of the six for which we can hypothesize some connection  
189 to desiccation. Biofilms have been shown to be important for desiccation tolerance of bacteria  
190 (15, 16) and trehalose has been shown to play a significant role in desiccation tolerance of  
191 eukaryotes and bacteria (30, 31). When added extrinsically to cultures, trehalose increased the  
192 desiccation tolerance of *A. baumannii* ATCC 19606 (22). However, a  $\Delta$ *mtlD-otsB* mutant of  
193 ATCC19606, defective in endogenous production of the compatible solutes, mannitol, and  
194 trehalose, was not more sensitive to desiccation than the wild type (22).

195

## 196 **DISCUSSION**

197 Depletion of water during desiccation leads to loss of membrane integrity and accompanying  
198 disruption of aerobic respiration results in the generation of reactive oxygen species, including  
199 hydrogen peroxide (32). So, it makes sense that *katE*, encoding catalase, contributes to  
200 desiccation tolerance. Proteomics analyses of *A. baumannii* showed that proteins involved in  
201 redox defense including catalase, alkyl peroxidase reductases and superoxide dismutase were  
202 elevated in stationary-phase cells (33), which is consistent with the observation made by many  
203 that cells stationary-phase cells survive desiccation much better than exponentially growing  
204 cells.

205

206 Since the desiccation-tolerance genes *ABUW\_2433* and *ABUW\_2437* are near or adjacent to  
207 *katE*, on the genome and all are likely to be controlled by CsrA, it seemed important to consider  
208 that they might somehow mediate oxidative stress tolerance even though the amino acid  
209 sequences of the encoded proteins don't have motifs typically associated with reactive oxygen  
210 species detoxification. However, we were unable to demonstrate that *ABUW\_2433::Tn* and  
211 *ABUW\_2437::Tn* mutants were sensitive to hydrogen peroxide and paraquat - both powerful  
212 oxidizing agents. In addition, a study that looked at effects of hydrogen peroxide exposure on  
213 gene expression in *A. baumannii*, found that *katE* but not *ABUW\_2433* or *ABUW\_2437*, was  
214 expressed at elevated levels and neither of these genes is part of the OxyR regulon that  
215 controls the response to oxidative stress in *A. baumannii* (34). Thus, we do not think that either  
216 of these proteins, which have the greatest defects in desiccation found to date, are likely to  
217 function by protecting cells against oxidative stress

218  
219 The predicted physical properties of *ABUW\_2433* provide suggestions as to how it may  
220 function. It is an intrinsically disordered protein (IDP) that is highly hydrophilic, with 27%  
221 positively charged amino acids residues and 31% negatively charged residues. It is also  
222 predicted to assume a collapsed or extended conformation, likely depending on its context  
223 (ROBETTA PFRMAT TS prediction; <https://robetta.bakerlab.org>). *ABUW\_2433* has 13 repeated  
224 AT-hook DNA binding motifs that extend across about 70% of the protein. This motif  
225 preferentially binds to AT-rich sequences in the minor groove of DNA. AT-hook DNA binding  
226 motifs are found primarily in eukaryotic proteins, many of which have roles in transcriptional  
227 regulation (35, 36). Only 8.5% of annotated AT hook DNA binding motifs are found in bacteria,  
228 but about half of these are found in gamma proteobacteria, the group to which *A. baumannii*  
229 belongs. We hypothesize that *ABUW\_2433* binds to *A. baumannii* DNA and somehow protects  
230 it from desiccation-induced damage. IDPs are critical for the microscopic animals called  
231 tardigrades to survive desiccation. When desiccated, some of these proteins vitrify and probably

232 trap desiccation sensitive molecules in a noncrystalline amorphous matrix, thereby protecting  
233 them from denaturation or other forms of destruction (37, 38). IDPs or proteins with IDP  
234 domains are less common in prokaryotes than in eukaryotes, but drawing from work on  
235 eukaryotes, they are proposed to play a central role in cellular process in bacteria that may  
236 depend on the formation of molecular condensates (39). It is possible that this is important for  
237 the viability of desiccated *A. baumannii*.

238

239 Although not much work has been done on *Acinetobacter* CsrA, based on what is known for  
240 other gamma proteobacteria, we hypothesize that a set of ncRNAs that is induced by a GacSA  
241 (ABUW\_3306 and ABUW\_3639) two-component regulatory system, controls the repressor  
242 activity of CsrA by sequestering it (40). We can draw a link between the GasSA system and  
243 CsrA because they both appear to control catabolism of the aromatic compound phenylacetate.  
244 An *A. baumannii*  $\Delta gacA$  mutant is unable to catabolize phenylacetate (41), and our proteomics  
245 results suggest that CsrA acts to repress the synthesis of at least one enzyme required for  
246 phenylacetate degradation. In fact, we have determined that the  $\Delta csrA$  mutant grows better on  
247 phenylacetate; with a doubling time of 39 min, than the wild type, which has doubling time of 50  
248 min. We hypothesize that a  $\Delta gacA$  mutant does not synthesize ncRNAs that would normally  
249 “sponge-up” CsrA, thus allowing CsrA to bind to the 13 -gene (ABUW\_2524 to ABUW\_2536)  
250 phenylacetate mRNA transcript to repress its translation. At this point we do not have a clear  
251 understanding of the inventory of *A. baumannii* ncRNAs that may bind to CsrA, but ncRNAs are  
252 abundant in AB5075, and several of them are expressed at extremely high levels (42). The  
253 desiccation phenotype of CsrA appears to depend on its ability to activate translation and  
254 although it’s difficult to reconcile this activity with a model where CsrA is sequestered by  
255 ncRNAs, it is known that ncRNA turnover can occur resulting in the release of free CsrA (43).  
256 Most of what is known about mechanisms of CsrA action centers on its role as a repressor of

257 translation (44–47) and it may be of interest to probe its capability as an activator in *A.*

258 *baumannii*.

259

260 We found that *A. baumannii* AB5075 survived desiccation for six days at 2% RH much better  
261 than two other *A. baumannii* strains that we tested, but it is important to note that most studies  
262 of desiccation tolerance have been carried out at about 30% RH or in room air and the  
263 emphasis has been on the number of days or months that a particular strain remains viable  
264 when desiccated. When Farrow et al (20) tested the survival of several strains that were dried  
265 and incubated at an RH of 25–61% (mean 46%) they found AB5075 to have an average  
266 survival time of 90 days, whereas strains ATCC19606 and ATCC17978 had average survival  
267 times of 3 and 34 days respectively. Even though AB5075 is tolerant to desiccation over  
268 months at a mean RH of 46% and over days at 2% RH, we cannot necessarily conclude that the  
269 same sets of genes are needed for desiccation tolerance under these two different conditions.  
270 For example, Farrow et al. (20) found that the response-regulator protein BmfR was important  
271 for desiccation tolerance of ATCC17978 in long term desiccation assays, whereas we did not  
272 observe a role of *bmfR* in protecting AB5075 from desiccation in shorter term incubations at  
273 2%RH (Table S1).

274

275 Here we established a robust assay for desiccation tolerance of a highly virulent strain of *A.*  
276 *baumannii* and identified two genes, *ABUW\_2433* and *ABUW\_2437*, that are extremely  
277 important for desiccation tolerance. Outside of the *Acinetobacter* genus, *ABUW\_2437* has  
278 homologs in *Pseudomonas stutzeri* (40% amino acid identity). However, except for a partial  
279 homolog found in *Enterobacteriaceae* bacterium TzEc051 (99% identity over 38% of the  
280 AB5075 protein), *ABUW\_2433* does not appear outside *Acinetobacter*. This and the unusual  
281 predicted physical properties of *ABUW\_2433* as anIDP, suggest that there is novel physiological  
282 basis for desiccation tolerance in *A. baumannii* that remains to be explored.

283

## 284 **MATERIALS AND METHODS**

285 **Bacterial strains and growth conditions.** Strains used in this study are listed in Table S3A.

286 Strain AB5075 (AB5075-UW) was used as a wild type (24) and individual transposon mutants

287 were obtained from the Manoil lab comprehensive ordered transposon mutant library at the

288 University of Washington (24). All strains except for the  $\Delta csrA$  mutant were routinely grown and

289 maintained in TY (10 g Tryptone, 5 g Yeast extract, and 8 g NaCl in 1000 ml) medium or BBL

290 Trypticase Soy Broth (TSB) media at 37°C, unless otherwise stated. The  $\Delta csrA$  mutant was

291 grown in M9/succinate.

292

293 **Desiccation assay.** Strains from a frozen stock (-80°C) were streaked onto TY plates and

294 incubated at 37°C. Colonies (three to five) were picked and inoculated into 2 ml of TSB, and

295 cultures were grown overnight at 37°C with a shaking speed of 200rpm. Overnight cultures were

296 diluted to yield an initial OD<sub>600</sub> of 0.025 in 10 ml TSB in a 50 ml Erlenmeyer flask. Cultures were

297 grown at 37°C with a shaking speed of 200 rpm to mid-exponential-phase (OD<sub>600</sub>=0.4 to 0.6) or

298 stationary-phase (24 hours after inoculation). Cells were harvested by centrifugation and

299 washed twice with Dulbecco's phosphate-buffered saline (DPBS, Gibco), and cell density was

300 adjusted to OD<sub>600</sub>=1 (about 5 x 10<sup>8</sup> cells/ml) with DPBS. Cell suspension (2 spots of 50 µl each

301 per membrane) was filtered onto a 0.4 µm Whatman nucleopore polycarbonate track-etched

302 membranes (25 mm diameter) that had been placed in Nalgene analytical filter units, and the

303 membranes were then placed into 15 ml uncapped centrifuge tubes. To obtain the T0 (baseline)

304 viable cell number, 1 ml of DPBS was immediately added to one tube and incubated for 5 min at

305 room temperature (24 ± 2°C) on a rotary shaker. Viable cell numbers were determined by

306 plating on TSB agar. For desiccation, tubes with membranes were placed in a Snapware

307 containers (2.3 x 6.3 x 8.4 inches) that contained DRIERITE in the lids of 50 ml centrifuge tubes

308 (x4, 7.5 g of DRIERITE desiccant in each lid) or saturated calcium chloride hexahydrate solution

309 in 5 ml beaker (x8) to yield the RHs of 2% or 30% ( $\pm 2$ ), respectively. The Snapware containers  
310 were incubated at room temperature. Digital hygrometers (VWR International Ltd) were placed  
311 in each container to monitor the RH. At desired time points, tubes containing membranes were  
312 removed from the containers, 1 ml of DPBS was added to each tube, and incubated for 5 min at  
313 room temperature on a rotary shaker. Viable cell counts were determined on TSB agar. For  
314 each strain, a minimum of three biological replicates of desiccation assays were performed  
315 except for individual transposon mutants, which were assayed twice for each allele.

316

317 **Construction of the  $\Delta csrA$  mutant.** In-frame deletion of the *csrA* (*ABUW\_2750*) gene was  
318 generated by overlap extension PCR as described (48). PCR primers are listed in Table S3B.  
319 PCR product was cloned into mobilizable suicide vector pEX2-TetRA and transformed into *E.*  
320 *coli* NEB 10-beta (New England Bio Labs). The sequence-verified deletion construct was  
321 transformed into *E. coli* S17-1, and further mobilized into *A. baumannii* strain AB5075 by  
322 conjugation on TY agar. Single recombinant conjugants were first selected on M9/succinate  
323 plate containing 20  $\mu\text{g/ml}$  Tc, and Tc resistant colonies were further plated onto M9/succinate  
324 plate containing 5% sucrose. Sucrose resistant and Tc sensitive colonies were screened by  
325 colony PCR and sequencing to validate the expected chromosomal in-frame deletion of the *csrA*  
326 gene.

327

328 To complement the  $\Delta csrA$  mutant, the full length *csrA* gene plus the 15 bp upstream that  
329 contains the putative ribosome binding site was PCR amplified and cloned into pMMB67EH-  
330 TetRA. The construct was transformed into *E. coli* NEB 10-beta (New England Bio Labs). The  
331 sequence-verified construct was transformed into *E. coli* S17-1, and further mobilized into the  
332  $\Delta csrA$  mutant by conjugation on M9/succinate plates containing 20  $\mu\text{g/ml}$  Tc. As a negative  
333 control, empty vector pMMB67EH-TetRA was used. The same procedure was used to clone  
334 *ABUW\_2433* and *ABUW\_2437* for complementation experiments.

335

336 **Phenotypic characterization of the  $\Delta csrA$  mutant.** M9/succinate was used in all experiments.

337 For motility assays, an overnight culture (16 to 18 hours) was diluted to yield  $OD_{600}=0.5$ , and 2

338  $\mu$ l of sample was spotted onto the freshly prepared M9/succinate plate and incubated at 37°C

339 for 24 h. For biofilm assays, an overnight culture was inoculated into 100  $\mu$ l of M9/succinate in

340 Costar vinyl 96 well “U” bottom plates (initial  $OD_{600}=0.05$ ), and the plates were sealed with

341 Breath-Easy sealing membranes. After incubation at room temperature for 48 h, culture was

342 removed, the plate was rinsed with tap water twice, and 150  $\mu$ l of 0.1% crystal violet solution

343 was added to each well. After incubating at room temperature for 15 min, crystal violet solution

344 was removed, the plate was rinsed with tap water 5 times, and the plate was dried at room

345 temperature. For catalase assays, cells were harvested at  $OD_{600}=0.5$ , supernatant was

346 removed, and cells were resuspended in DPBS to yield 10 mg wet cell/100  $\mu$ l DPBS. 100  $\mu$ l of

347 cell suspensions were placed in 13 x 100 mm borosilicate glass tubes. Then 100  $\mu$ l of 1% Triton

348 X-100 and 100  $\mu$ l of 30% hydrogen peroxide were added, mixed thoroughly, and incubated for

349 15 min at room temperature (49) .

350

351 **Label-free protein quantification.** Since the  $\Delta csrA$  mutant had a severe growth defect on TY

352 medium, both the wild type and  $\Delta csrA$  mutant were grown in M9/succinate. Two biological sample

353 replicates were prepared for each strain. Cells from each culture were harvested at  $OD_{600}=0.5$  by

354 centrifugation, washed twice with DPBS, and cells were stored in -80°C before further analysis.

355 Cells were lysed in buffer containing 4% SDS, 100 mM Tris pH8.0, 10 mM DTT by heating at

356 95°C for 5 min. After cooling to room temperature, the lysates were sonicated with ultrasonication

357 probe on ice to shear DNA. Total protein concentration was determined by the BCA assay

358 (Thermo Pierce, Rockford, IL). 500  $\mu$ g of each protein lysate was reduced and alkylated, diluted

359 in 8 M urea solution, and the SDS was removed with a 3kD molecular weight cutoff filter. After

360 buffer exchange, the protein lysates were digested with trypsin (Promega, Madison, WI) at 37°C



361 overnight and the digested samples were desalted with 1cc C18 Sep-Pak solid phase extraction  
362 cartridges (Milford, MA, Waters). The eluted samples were vacuum dried and resuspended in  
363 0.1% formic acid. Reverse phase nanoLC-MS analysis of the protein digests was carried out with  
364 a Thermo Easy-nanoLC coupled to a Thermo Q-Exactive Plus Orbitrap mass spectrometer.  
365 Triplicate top 20 data-dependent acquisition runs were acquired for each sample, and 1 µg of  
366 protein digest was loaded for each run. The peptides were separated by a 50 cm x 75 µm I.D C8  
367 column (5 µm diameter, 100 Å pore size C8 MichromMagic beads) with a 90 min 10 to 30% B  
368 gradient (solvent A: 0.1% formic acid in water, solvent B: 0.1% formic acid in acetonitrile, flow rate  
369 300 nl/min). The MS data acquisition parameters were set as follows: full MS scan resolution 70k,  
370 maximum ion injection time 100 mS, AGC target  $10^6$ , scan range of 400 to 2000 m/z; MS/MS scan  
371 resolution 17.5 k, maximum ion injection time 100 mS, AGC target  $5^4$ , isolation window 1.6 m/z,  
372 HCD NCE 35 scan range of 200 to 2000 m/z; loop count 20, intensity threshold  $5^3$ , underfill ratio  
373 1%, dynamic exclusion 10 sec. High resolution MS<sup>2</sup> spectra were searched against a target-decoy  
374 proteome database of strain AB5075 (a total of 7678 sequences) downloaded from Uniprot  
375 (Oct17, 2017) using Comet (version 2015.02 rev. 1) (50) with following parameters: precursor  
376 peptide mass tolerance 20 ppm, allowing for -1, 0, +1, +2, or +3 <sup>13</sup>C offsets; fragment ion mass  
377 tolerance 0.02 Da; static modification, carbamidomethylation of cysteine (57.0215 Da); variable  
378 modification, methionine oxidation (15.9949 Da). The search results were further processed by  
379 PeptideProphet (51) for probability assignment to each peptide-spectrum match, and  
380 ProteinProphet (52) for protein inference and protein probability modeling. The output pepXML  
381 files from three technical replicates were grouped for subsequent spectral counting analysis using  
382 Abacus (53). The pepXML and protXML files for each sample, combined ProteinProphet file from  
383 all samples were parsed into Abacus for spectral counting of each protein. The following filters  
384 were applied for extracting spectral counts from MS/MS datasets: (1) the minimum  
385 PeptideProphet score the best peptide match of a protein must have maxIniProbTH=0.99; (2) The  
386 minimum PeptideProphet score a peptide must have to be even considered by Abacus,



387 iniProbTH=0.50; (3) The minimum ProteinProphet score a protein group must have in the  
388 COMBINED file, minCombinedFilePw=0.90. Spectral counts for 1616 proteins were reported  
389 across four sample groups (two strains and two biological replicates) with estimated protein false  
390 discovery rate of 1.94%. The protein expression fold changes between wild type AB5075 and  
391  $\Delta csrA$  mutant were computed from adjusted spectral counts output from Abacus. The mass  
392 spectrometry data have been deposited to the ProteomeXchange Consortium via the PRIDE  
393 partner repository with the dataset identifier xxxxxxxx..

394

395

### 396 **ACKNOWLEDGMENTS**

397 We thank Dr. Hemantha Don Kulasekara and Dr. Samuel Miller (University of Washington) for  
398 sharing the pEX2-TetRA and pMMB67EH-TetRA vectors. We thank Indranil Biswas for alerting  
399 us to the possibility that intrinsically disordered proteins could be involved in desiccation  
400 tolerance in *A. baumannii*.

401

### 402 **FUNDING**

403 This work was supported by the Functional Genomics Program, National Institute of Allergy and  
404 Infectious Diseases under Grant 1U19AI107775-01.

405

406

407

408

409 **Table 1. Genes that contribute to desiccation tolerance of *A. baumannii* AB5075.**

| Gene        | Gene name   | Gene annotation                 | Relative viability loss ratio (day 6/day 0 desiccation) <sup>a</sup> | Protein abundance (ratio of WT/ $\Delta$ <i>csrA</i> ) |
|-------------|-------------|---------------------------------|----------------------------------------------------------------------|--------------------------------------------------------|
| AB5075 (WT) |             |                                 | 1.0                                                                  |                                                        |
| ABUW_0916   |             | Biofilm-associated protein      | 1.5                                                                  | 2.6                                                    |
| ABUW_2433   |             | KGG domain-containing protein   | 125                                                                  | 4.3                                                    |
| ABUW_2436   | <i>katE</i> | Catalase                        | 7.5                                                                  | 3.2                                                    |
| ABUW_2437   |             | Heme oxygenase-like protein     | 150                                                                  | 10.5                                                   |
| ABUW_2639   |             | Universal stress protein family | 6.0                                                                  | 4.4                                                    |
| ABUW_2724   |             | Hypothetical protein            | 4.0                                                                  | 2.4                                                    |
| ABUW_2750   | <i>csrA</i> | Carbon storage regulator        | 480                                                                  | 8.5                                                    |
| ABUW_3123   | <i>otsA</i> | Trehalose-6-phosphate synthase  | 2.0                                                                  | 10.5                                                   |
| ABUW_3346   | <i>acnA</i> | Aconitate hydratase 1           | 1.5                                                                  | 3.2                                                    |

410 <sup>a</sup> All mutants were except the  $\Delta$ *csrA* strain were grown in TSB broth to the stationary phase of growth  
411 prior to being desiccated. The viability loss of wt day6/day 0 was 17 for the WT grown in TSB broth. The  
412 viability loss of WT grown in M9/succinate was 276

413

414

415 **FIGURE LEGENDS**

416 **Figure 1.** Desiccation tolerance of *A. baumannii*. (A) Comparison of AB5075, *E. coli* W3110,  
417 and *P. aeruginosa* PAO1 at 30% RH or 2% RH. (B) Desiccation tolerance of *A. baumannii*  
418 strains AB5075, ATCC17978, and ATCC19606 after 0 days (control) and 6 days of desiccation  
419 at 30% RH or 2% RH. The cell numbers represent the total number of viable cells recovered  
420 from each membrane. The data are the average of three or more biological replicates, and  
421 standard deviations are shown as error bars.

422

423 **Figure 2.** Growth and desiccation tolerance of a  $\Delta csrA$  mutant (A) Comparison of wild type (WT)  
424 and a  $\Delta csrA$  mutant on TY and M9/succinate agar and in TY and M9/succinate broth. (B)  
425 Desiccation tolerance of WT,  $\Delta csrA$  mutant,  $\Delta csrA$  mutant with pMMB (empty vector), and  $\Delta csrA$   
426 mutant with *csrA* expressed in trans (pAB2750) at day 0 and at day 6 of desiccation at 2% RH  
427 or at 6 days in PBS. The cell number represents the total number of viable cells recovered from  
428 each membrane. The data are the average of three or more biological replicates, and standard  
429 deviations are shown as error bars.

430

431 **Figure 3.** Phenotypes of the  $\Delta csrA$  mutant: (A) twitching motility; (B) growth of wild type (black  
432 symbol) or the  $\Delta csrA$  mutant (red symbol) in M9/succinate in the absence (closed symbol) or  
433 presence (open symbol) of 0.5% ethanol. The data shown are representative of each strain and  
434 condition; (C) crystal violet staining of biofilms from wild type,  $\Delta csrA$  mutant,  $\Delta csrA$  mutant with  
435 pMMB (empty vector), or  $\Delta csrA$  mutant with pAB2750; and (D) catalase activity of wild type,  
436  $\Delta csrA$  mutant,  $\Delta csrA$  mutant with pMMB (empty vector), or  $\Delta csrA$  mutant with pAB2750.

437

438 **Figure 4.** *A. baumannii* genes important for desiccation tolerance. (A) Genes and (B)  
439 Desiccation tolerance of mutants at 2% RH. The cell number represents the total number of

440 viable cells recovered from each membrane. The data are the average of three or more  
441 biological replicates, and standard deviations are shown as error bars.

442

443 **Figure 5.** Effect of expression of *ABUW\_2433* (red bars) or *ABUW\_2337* (blue bars) gene *in*  
444 *trans* on desiccation tolerance of *A. baumannii* (A) ATCC17978 and (B) ATCC19606 after 0  
445 days (control) and 6 days of desiccation at 2% RH. Empty vector (pMMB, black bars) was used  
446 as a control. The data are the average of three or more biological replicates, and standard  
447 deviations are shown as error bars.

448

449

450

## SUPPLEMENTAL MATERIAL

**Figure S1.** Desiccation tolerance of *A. baumannii* AB5075 cells from the log- and stationary-phases of growth. The cell number represents the total number of viable cells recovered from each membrane. The data are the averages of three or more biological replicates, and standard deviations are shown as error bars.

**Figure S2.** Complementation of desiccation phenotypes of (A) *ABUW\_2433::Tn* and (B) *ABUW\_2437::Tn* after 0 days (control) and 6 days of desiccation at 2% RH. Empty vector (pMMB) was used as a control. The data are the average of three or more biological replicates, and standard deviations are shown as error bars.

**Table S1.** Mutants from the three-allele library tested for desiccation tolerance

**Table S2.** (A) Label-free protein quantification of wild type and the  $\Delta csrA$  mutant. (B) List of proteins up-regulated (ratio of  $\Delta csrA/WT \geq 2.5$  and  $\Delta csrA$  read count  $\geq 7.5$ ) in the  $\Delta csrA$  mutant compared to wild type. (C) List of proteins down-regulated (ratio of  $\Delta csrA/WT \leq 0.4$  and WT read count  $\geq 7.5$ ) in the  $\Delta csrA$  mutant compared to wild type.

**Table S3.** (A) Bacterial strains used in this study. (B) Plasmids and primers used in this study

451 REFERENCES

452

- 453 1. Magill SS, Edwards JR, Bamberg W, Beldavs ZG, Dumyati G, Kainer MA, Lynfield R, Maloney M,  
454 McAllister-Hollod L, Nadle J, Ray SM, Thompson DL, Wilson LE, Fridkin SK, Team EIPH-AI and  
455 AUPS. 2014. Multistate Point-Prevalence Survey of Health Care–Associated Infections. *New Engl J*  
456 *Medicine* 370:1198–1208.
- 457 2. Marchetti A, Rossiter R. 2013. Economic burden of healthcare-associated infection in US acute care  
458 hospitals: societal perspective. *J Med Econ* 16:1399–1404.
- 459 3. Datta R, Platt R, Yokoe DS, Huang SS. 2011. Environmental Cleaning Intervention and Risk of  
460 Acquiring Multidrug-Resistant Organisms From Prior Room Occupants. *Arch Intern Med* 171:491–494.
- 461 4. Huang SS, Datta R, Platt R. 2006. Risk of Acquiring Antibiotic-Resistant Bacteria From Prior Room  
462 Occupants. *Arch Intern Med* 166:1945–1951.
- 463 5. Munoz-Price LS, Namias N, Cleary T, Fajardo-Aquino Y, DePascale D, Arheart KL, Rivera JI, Doi Y.  
464 2013. *Acinetobacter baumannii*: Association between Environmental Contamination of Patient Rooms  
465 and Occupant Status. *Infect Control Hosp Epidemiology* 34:517–520.
- 466 6. Thom KA, Johnson JK, Lee MS, Harris AD. 2011. Environmental contamination because of  
467 multidrug-resistant *Acinetobacter baumannii* surrounding colonized or infected patients. *Am J Infect*  
468 *Control* 39:711–715.
- 469 7. Harding CM, Hennon SW, Feldman MF. 2018. Uncovering the mechanisms of *Acinetobacter*  
470 *baumannii* virulence. *Nat Rev Microbiol* 16:91–102.
- 471 8. Giannouli M, Antunes LC, Marchetti V, Triassi M, Visca P, Zarrilli R. 2013. Virulence-related traits of  
472 epidemic *Acinetobacter baumannii* strains belonging to the international clonal lineages I-III and to the  
473 emerging genotypes ST25 and ST78. *Bmc Infect Dis* 13:282.
- 474 9. Jawad A, Seifert H, Snelling AM, Heritage J, Hawkey PM. 1998. Survival of *Acinetobacter baumannii*  
475 on Dry Surfaces: Comparison of Outbreak and Sporadic Isolates. *J Clin Microbiol* 36:1938–1941.
- 476 10. Antunes LCS, Imperi F, Carattoli A, Visca P. 2011. Deciphering the multifactorial nature of  
477 *Acinetobacter baumannii* pathogenicity. *Plos One* 6:e22674.
- 478 11. Wendt C, Dietze B, Dietz E, Rüdén H. 1997. Survival of *Acinetobacter baumannii* on dry surfaces. *J*  
479 *Clin Microbiol* 35:1394–1397.
- 480 12. Lebre PH, Maayer PD, Cowan DA. 2017. Xerotolerant bacteria: surviving through a dry spell. *Nat*  
481 *Rev Microbiol* 15:285–296.
- 482 13. Potts M. 1994. Desiccation tolerance of prokaryotes. *Microbiol Rev* 58:755–805.

- 483 14. Gayoso CM, Mateos J, Méndez JA, Fernández-Puente P, Rumbo C, Tomás M, Ilarduya ÓM de, Bou  
484 G. 2013. Molecular Mechanisms Involved in the Response to Desiccation Stress and Persistence in  
485 *Acinetobacter baumannii*. *J Proteome Res* 13:460–476.
- 486 15. Espinal P, Marti S, Vila J. 2012. Effect of biofilm formation on the survival of *Acinetobacter*  
487 *baumannii* on dry surfaces. *J Hosp Infect* 80:56–60.
- 488 16. Orsinger-Jacobsen SJ, Patel SS, Vellozzi EM, Gialanella P, Nimrichter L, Miranda K, Martinez LR.  
489 2013. Use of a stainless steel washer platform to study *Acinetobacter baumannii* adhesion and biofilm  
490 formation on abiotic surfaces. *Microbiology+* 159:2594–2604.
- 491 17. Wang X, Cole CG, DuPai CD, Davies BW. 2020. Protein Aggregation is Associated with  
492 *Acinetobacter baumannii* Desiccation Tolerance. *Microorg* 8:343.
- 493 18. Boll JM, Tucker AT, Klein DR, Beltran AM, Brodbelt JS, Davies BW, Trent MS. 2015. Reinforcing  
494 Lipid A Acylation on the Cell Surface of *Acinetobacter baumannii* Promotes Cationic Antimicrobial  
495 Peptide Resistance and Desiccation Survival. *Mbio* 6:e00478–15.
- 496 19. Aranda J, Bardina C, Beceiro A, Rumbo S, Cabral MP, Barbé J, Bou G. 2011. *Acinetobacter*  
497 *baumannii* RecA Protein in Repair of DNA Damage, Antimicrobial Resistance, General Stress Response,  
498 and Virulence. *J Bacteriol* 193:3740–3747.
- 499 20. Farrow JM, Wells G, Pesci EC. 2018. Desiccation tolerance in *Acinetobacter baumannii* is mediated  
500 by the two-component response regulator BfmR. *Plos One* 13:e0205638.
- 501 21. Farrow JM, Wells G, Palethorpe S, Adams MD, Pesci EC. 2020. CsrA supports both environmental  
502 persistence and host-associated growth of *Acinetobacter baumannii*. *Infect Immun*  
503 <https://doi.org/10.1128/iai.00259-20>.
- 504 22. Zeidler S, Müller V. 2019. The role of compatible solutes in desiccation resistance of *Acinetobacter*  
505 *baumannii*. *Microbiologyopen* 8:e00740.
- 506 23. Jacobs AC, Thompson MG, Black CC, Kessler JL, Clark LP, McQueary CN, Gancz HY, Corey BW,  
507 Moon JK, Si Y, Owen MT, Hallock JD, Kwak YI, Summers A, Li CZ, Rasko DA, Penwell WF, Honnold  
508 CL, Wise MC, Waterman PE, Lesho EP, Stewart RL, Actis LA, Palys TJ, Craft DW, Zurawski DV. 2014.  
509 AB5075, a Highly Virulent Isolate of *Acinetobacter baumannii*, as a Model Strain for the Evaluation of  
510 Pathogenesis and Antimicrobial Treatments. *Mbio* 5:e01076–14.
- 511 24. Gallagher LA, Ramage E, Weiss EJ, Radey M, Hayden HS, Held KG, Huse HK, Zurawski DV,  
512 Brittnacher MJ, Manoil C. 2015. Resources for Genetic and Genomic Analysis of Emerging Pathogen  
513 *Acinetobacter baumannii*. *J Bacteriol* 197:2027–2035.
- 514 25. LeGrand K, Petersen S, Zheng Y, Liu KK, Ozturk G, Chen J-Y, Young GM. 2015. CsrA impacts  
515 survival of *Yersinia enterocolitica* by affecting a myriad of physiological activities. *Bmc Microbiol* 15:31.
- 516 26. Chin CY, Tipton KA, Farokhyfar M, Burd EM, Weiss DS, Rather PN. 2018. A high-frequency  
517 phenotypic switch links bacterial virulence and environmental survival in *Acinetobacter baumannii*. *Nat*  
518 *Microbiol* 3:563–569.

- 519 27. Tipton KA, Chin C-Y, Farokhyfar M, Weiss DS, Rather PN. 2018. Role of capsule in resistance to  
520 disinfectants, host antimicrobials and desiccation in *Acinetobacter baumannii*. *Antimicrob Agents Ch*  
521 62: AAC.01188-18.
- 522 28. Erdős G, Pajkos M, Dosztányi Z. 2021. IUPred3: prediction of protein disorder enhanced with  
523 unambiguous experimental annotation and visualization of evolutionary conservation. *Nucleic Acids Res*  
524 49: gkab408-.
- 525 29. Elhosseiny NM, Amin MA, Yassin AS, Attia AS. 2015. *Acinetobacter baumannii* universal stress  
526 protein A plays a pivotal role in stress response and is essential for pneumonia and sepsis pathogenesis.  
527 *Int J Med Microbiol* 305:114–123.
- 528 30. Crowe JH, Oliver AE, Tablin F. 2002. Is There a Single Biochemical Adaptation to Anhydrobiosis?  
529 *Integr Comp Biol* 42:497–503.
- 530 31. Leslie SB, Israeli E, Lighthart B, Crowe JH, Crowe LM. 1995. Trehalose and sucrose protect both  
531 membranes and proteins in intact bacteria during drying. *Appl Environ Microb* 61:3592–7.
- 532 32. França MB, Panek AD, Eleutherio ECA. 2007. Oxidative stress and its effects during dehydration.  
533 *Comp Biochem Physiology Part Mol Integr Physiology* 146:621–631.
- 534 33. Soares NC, Cabral MP, Gayoso C, Mallo S, Rodriguez-Velo P, Fernández-Moreira E, Bou G. 2010.  
535 Associating Growth-Phase-Related Changes in the Proteome of *Acinetobacter baumannii* with Increased  
536 Resistance to Oxidative Stress. *J Proteome Res* 9:1951–1964.
- 537 34. Juttukonda LJ, Green ER, Lonergan ZR, Heffern MC, Chang CJ, Skaar EP. 2018. *Acinetobacter*  
538 *baumannii* OxyR regulates the transcriptional response to hydrogen peroxide. *Infect Immun*  
539 87:IAI.00413-18.
- 540 35. Aravind L, Landsman D. 1998. AT-hook motifs identified in a wide variety of DNA-binding proteins.  
541 *Nucleic Acids Res* 26:4413–4421.
- 542 36. Su L, Deng Z, Leng F. 2020. The Mammalian High Mobility Group Protein AT-Hook 2 (HMGA2):  
543 Biochemical and Biophysical Properties, and Its Association with Adipogenesis. *Int J Mol Sci* 21:3710.
- 544 37. Boothby TC, Tapia H, Brozena AH, Piszkiwicz S, Smith AE, Giovannini I, Rebecchi L, Pielak GJ,  
545 Koshland D, Goldstein B. 2017. Tardigrades Use Intrinsically Disordered Proteins to Survive  
546 Desiccation. *Mol Cell* 65:975-984.e5.
- 547 38. Hesgrove C, Boothby TC. 2020. The biology of tardigrade disordered proteins in extreme stress  
548 tolerance. *Cell Commun Signal* 18:178.
- 549 39. Cohan MC, Pappu RV. 2020. Making the Case for Disordered Proteins and Biomolecular  
550 Condensates in Bacteria. *Trends Biochem Sci* 45:668–680.
- 551 40. Lapouge K, Schubert M, Allain FH-T, Haas D. 2008. Gac/Rsm signal transduction pathway of  
552 gamma-proteobacteria: from RNA recognition to regulation of social behaviour. *Mol Microbiol* 67:241  
553 253.



- 554 41. Cerqueira GM, Kostoulias X, Khoo C, Aibinu I, Qu Y, Traven A, Peleg AY. 2014. A global virulence  
555 regulator in *Acinetobacter baumannii* and its control of the phenylacetic acid catabolic pathway. *J Infect*  
556 *Dis* 210:46–55.
- 557 42. Weiss A, Broach WH, Lee MC, Shaw LN. 2016. Towards the complete small RNome of  
558 *Acinetobacter baumannii*. *Microb Genom* 2:e000045.
- 559 43. Romeo T, Vakulskas CA, Babitzke P. 2013. Post-transcriptional regulation on a global scale: form  
560 and function of Csr/Rsm systems. *Environ Microbiol* 15:313–324.
- 561 44. Pourciau C, Lai Y-J, Gorelik M, Babitzke P, Romeo T. 2020. Diverse Mechanisms and Circuitry for  
562 Global Regulation by the RNA-Binding Protein CsrA. *Front Microbiol* 11:601352.
- 563 45. Romeo T, Babitzke P. 2018. Global Regulation by CsrA and Its RNA Antagonists. *Microbiol Spectr*  
564 6.
- 565 46. Sobrero PM, Valverde C. 2020. Comparative Genomics and Evolutionary Analysis of RNA-Binding  
566 Proteins of the CsrA Family in the Genus *Pseudomonas*. *Frontiers Mol Biosci* 7:127.
- 567 47. Renda A, Poly S, Lai Y-J, Pannuri A, Yakhnin H, Potts AH, Bevilacqua PC, Romeo T, Babitzke P.  
568 2020. CsrA-Mediated Translational Activation of *ymdA* Expression in *Escherichia coli*. *Mbio* 11.
- 569 48. Horton RM, Ho SN, Pullen JK, Hunt HD, Cai Z, Pease LR. 1993. Gene splicing by overlap extension.  
570 *Methods in enzymology* 217:270–279.
- 571 49. Iwase T, Tajima A, Sugimoto S, Okuda K, Hironaka I, Kamata Y, Takada K, Mizunoe Y. 2013. A  
572 Simple Assay for Measuring Catalase Activity: A Visual Approach. *Sci Rep-uk* 3:3081.
- 573 50. Eng JK, Jahan TA, Hoopmann MR. 2013. Comet: An open-source MS/MS sequence database search  
574 tool. *Proteomics* 13:22–24.
- 575 51. Keller A, Nesvizhskii AI, Kolker E, Aebersold R. 2002. Empirical Statistical Model To Estimate the  
576 Accuracy of Peptide Identifications Made by MS/MS and Database Search. *Anal Chem* 74:5383–5392.
- 577 52. Nesvizhskii AI, Keller A, Kolker E, Aebersold R. 2003. A Statistical Model for Identifying Proteins  
578 by Tandem Mass Spectrometry. *Anal Chem* 75:4646–4658.
- 579 53. Fermin D, Basrur V, Yocum AK, Nesvizhskii AI. 2011. Abacus: A computational tool for extracting  
580 and pre-processing spectral count data for label-free quantitative proteomic analysis. *Proteomics*  
581 11:1340–1345.

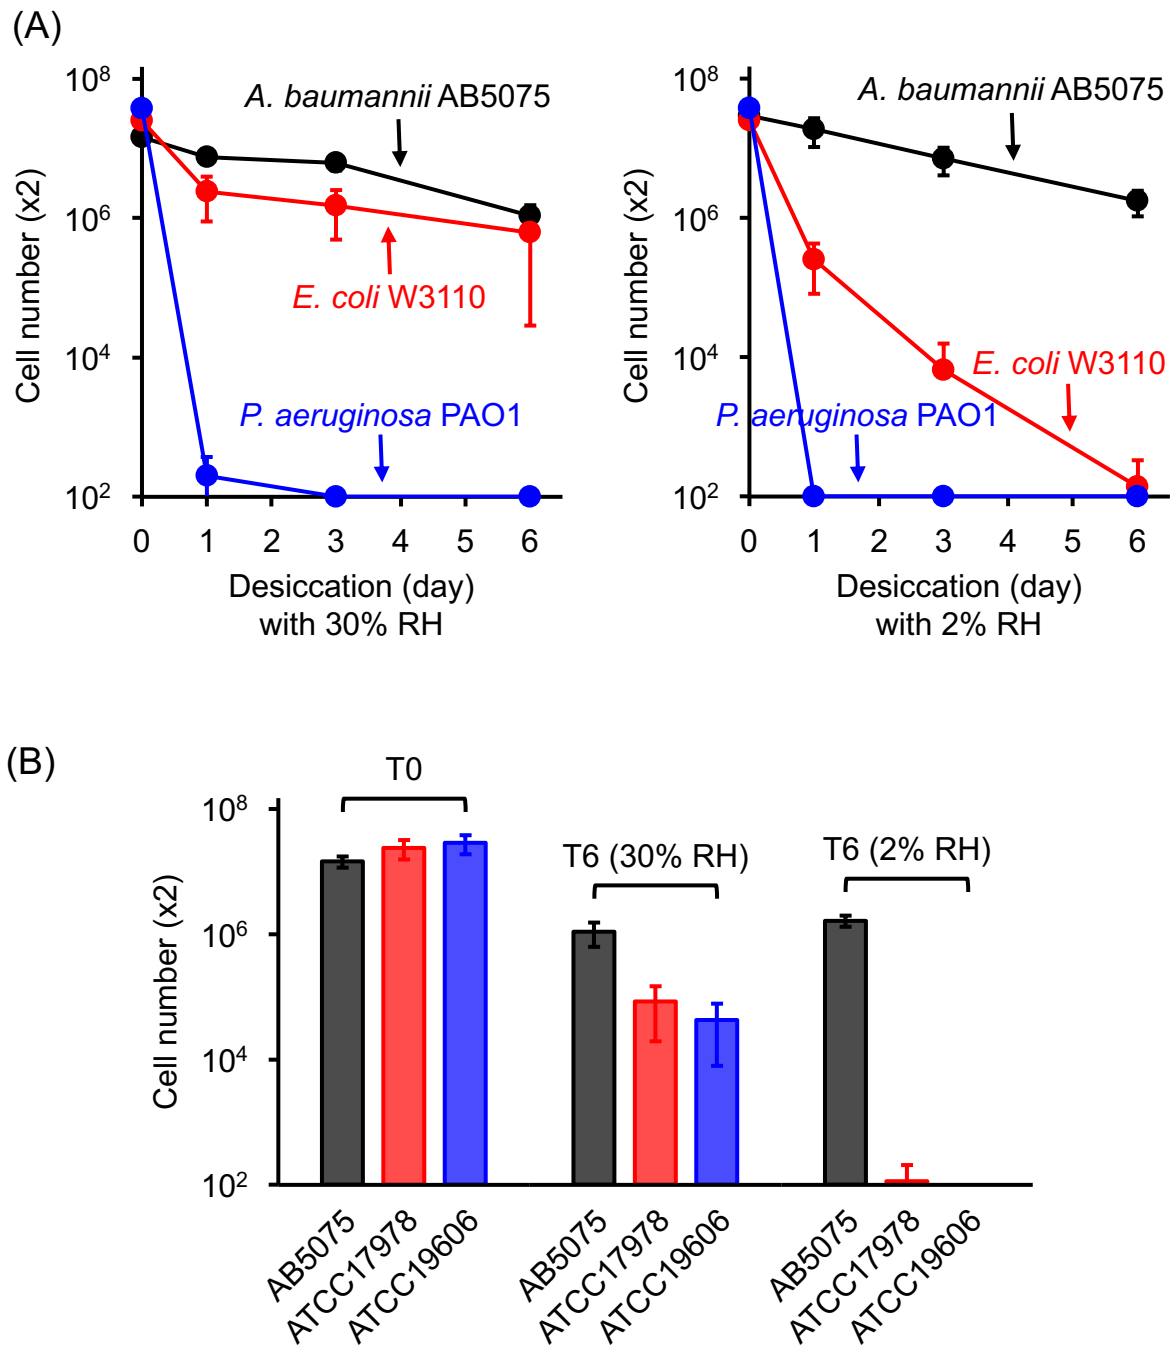

**Figure 1.** Desiccation tolerance of *A. baumannii*. (A) Comparison of AB5075, *E. coli* W3110, and *P. aeruginosa* PAO1 at 30% RH or 2% RH. (B) Desiccation tolerance of *A. baumannii* strains AB5075, ATCC17978, and ATCC19606 after 0 days (control) and 6 days of desiccation at 30% RH or 2% RH. The cell numbers represent the total number of viable cells recovered from each membrane. The data are the average of three or more biological replicates, and standard deviations are shown as the error bars.

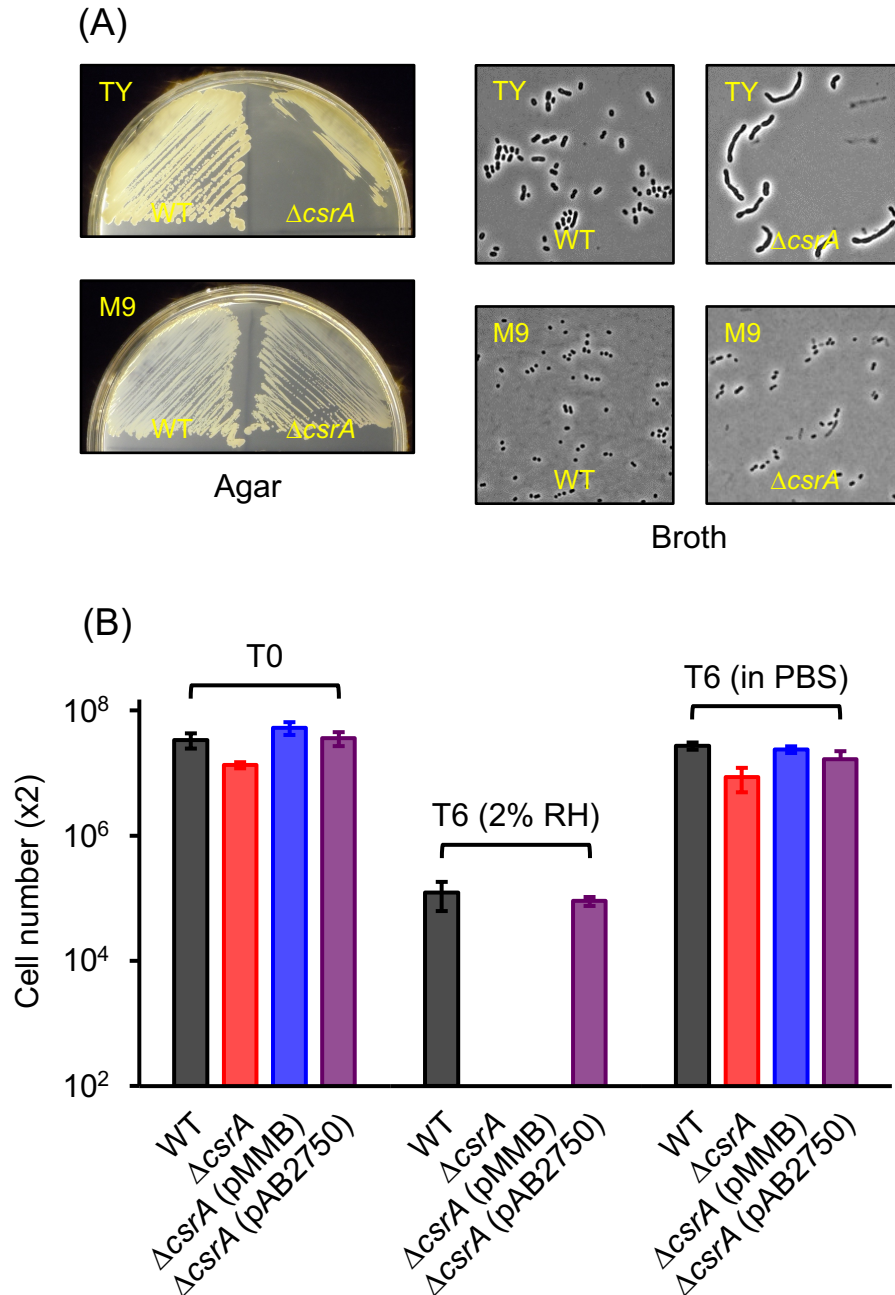

**Figure 2.** Growth and desiccation tolerance of the  $\Delta csrA$  mutant (A) Comparison of wild type (WT) and the  $\Delta csrA$  mutant on TY and M9/succinate agar and in TY and M9/succinate broth. (B) Desiccation tolerance of WT,  $\Delta csrA$  mutant,  $\Delta csrA$  mutant with pMMB (empty vector), and  $\Delta csrA$  mutant with *csrA* expressed in trans (pAB2750) at day 0 and at day 6 of desiccation at 2% RH or at 6 days in PBS. The cell number represents the total number of viable cells recovered from each membrane. The data are the average of three or more biological replicates, and standard deviations are shown as the error bar.

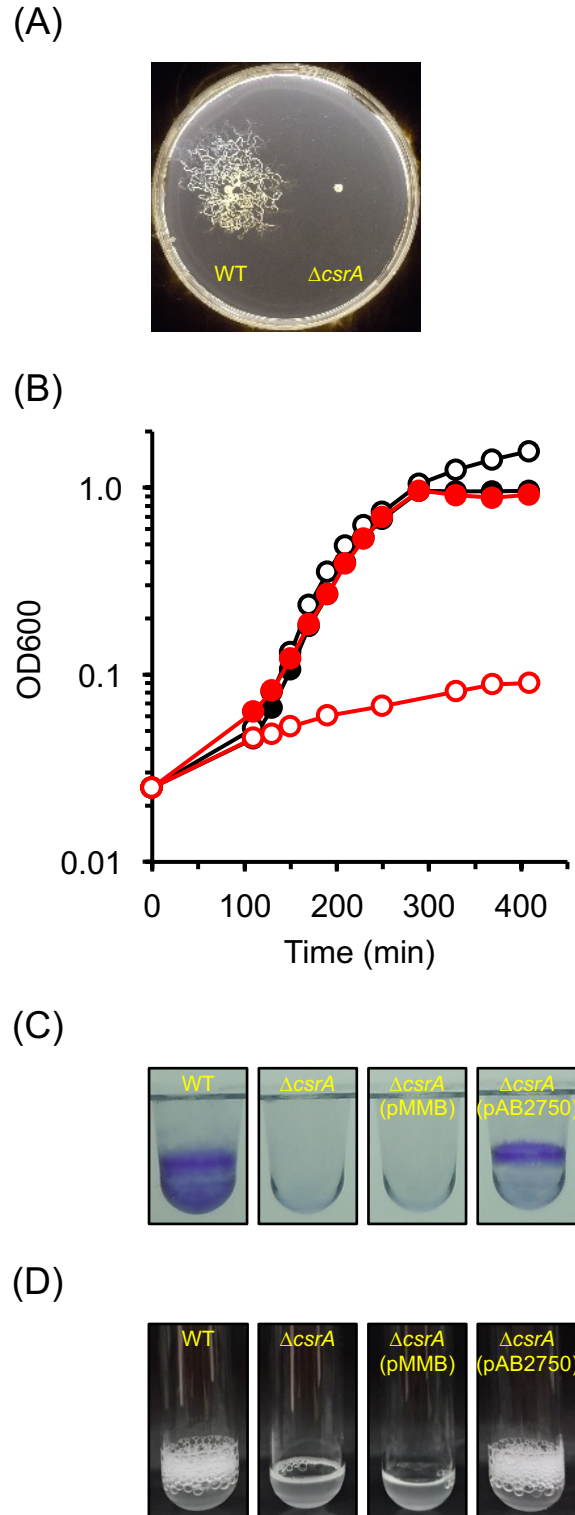

**Figure 3.** Phenotypes of the  $\Delta csrA$  mutant: (A) twitching motility; (B) growth of wild type (black symbol) or the  $\Delta csrA$  mutant (red symbol) in M9/succinate in the absence (closed symbol) or presence (open symbol) of 0.5% ethanol. The data shown are the representative of each strain and condition; (C) crystal violet staining of biofilms from wild type,  $\Delta csrA$  mutant,  $\Delta csrA$  mutant with pMMB (empty vector), or  $\Delta csrA$  mutant with pAB2750; and (D) catalase activity of wild type,  $\Delta csrA$  mutant,  $\Delta csrA$  mutant with pMMB (empty vector), or  $\Delta csrA$  mutant with pAB2750.

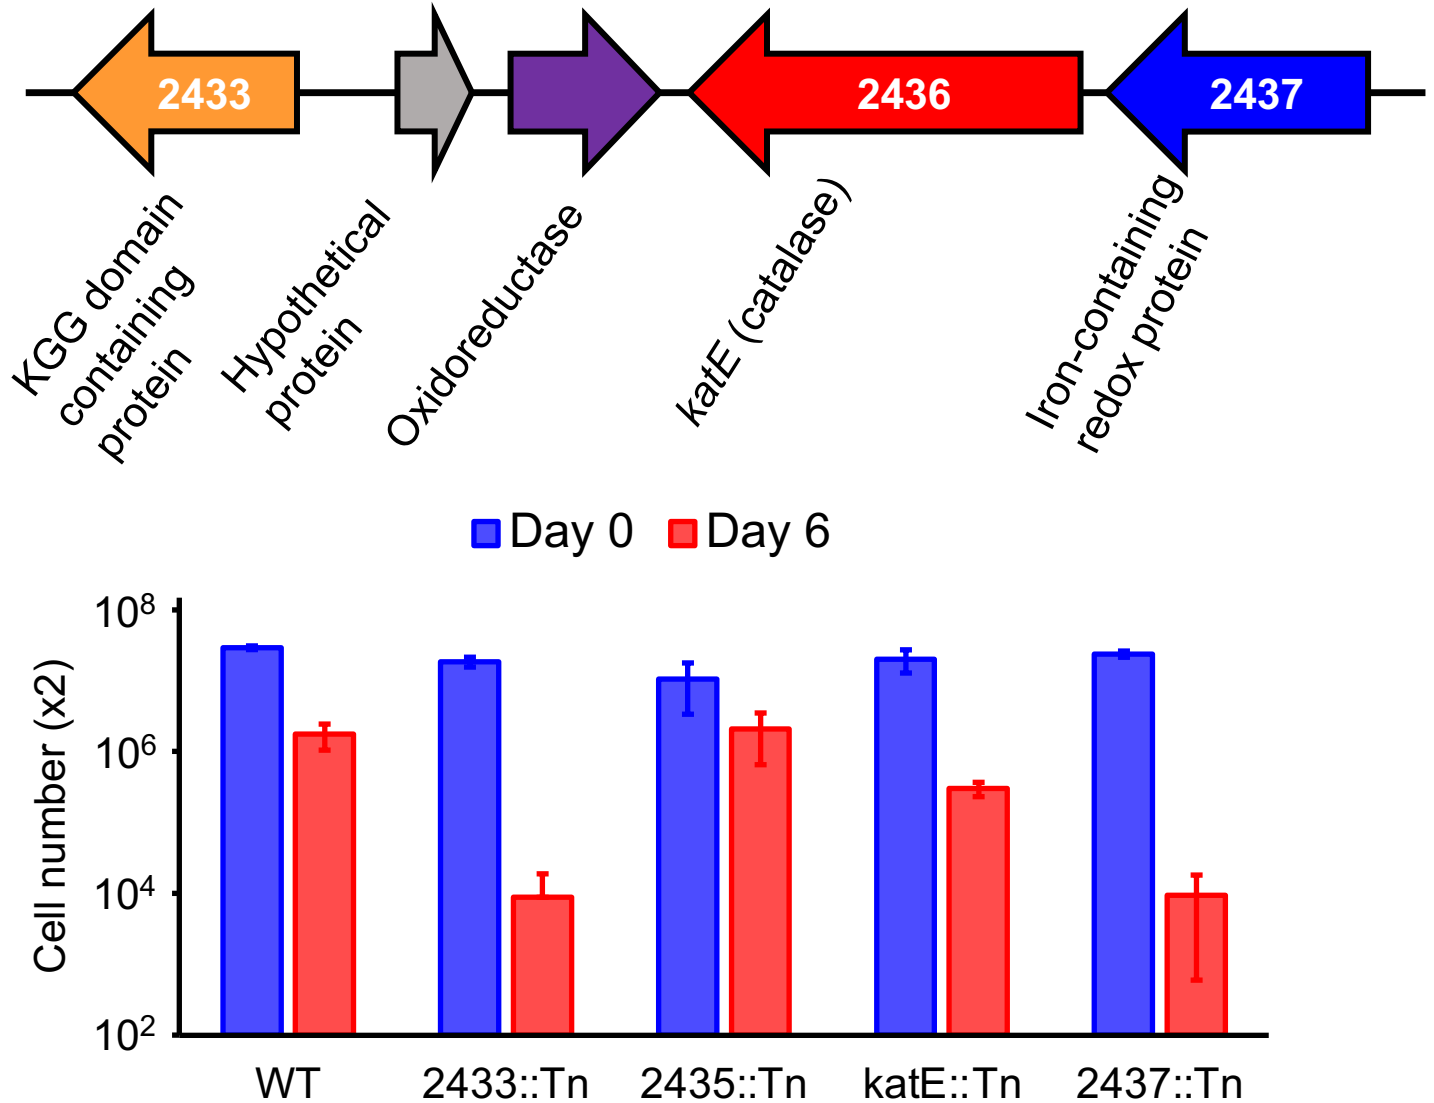

Figure 4. *A. baumannii* genes important for desiccation tolerance. (A) Genes (B) Desiccation tolerance of mutants at 2% RH. The cell number represents the total number of viable cells recovered from each membrane. The data are the average of three or more biological replicates, and standard deviations are shown as the error bar.

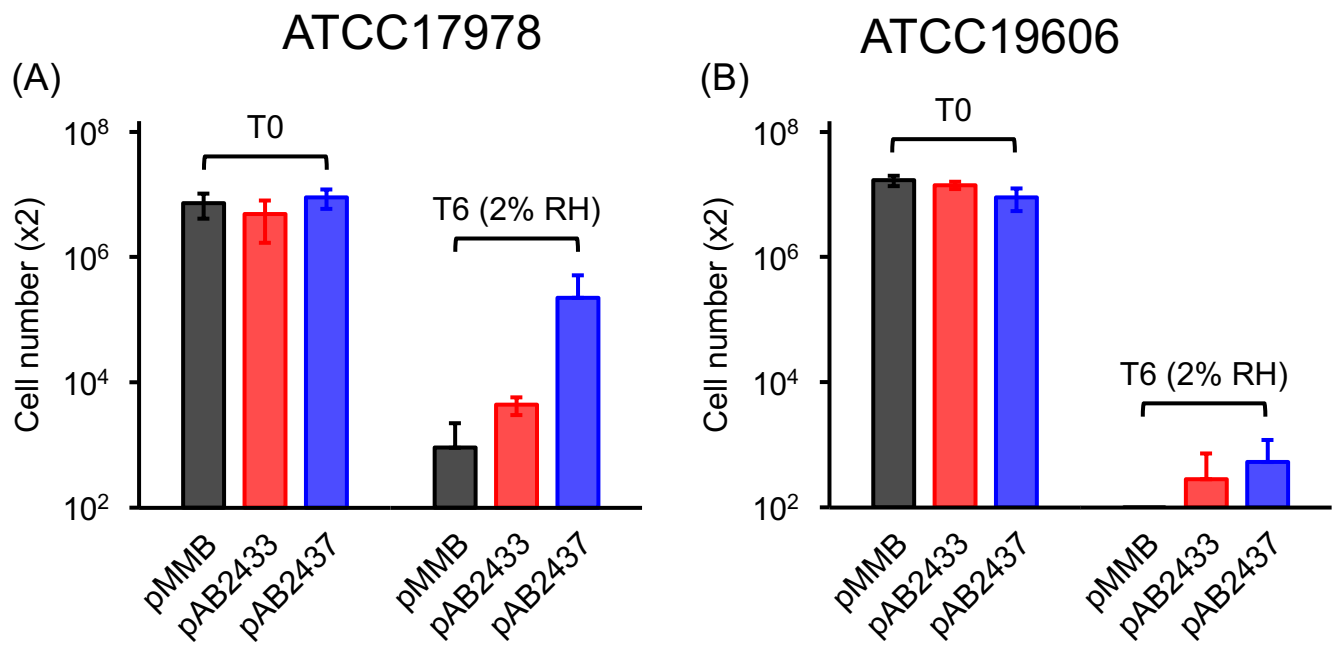

**Figure 5.** Effect of expression of ABUW\_2433 (red bar) or ABUW\_2337 (blue bar) gene *in trans* desiccation tolerance *A. baumannii* (A) ATCC17978 and (B) ATCC19606 after 0 days (control) and 6 days of desiccation at 2% RH. Empty vector (pMMB, black bar) was used as a control. The data are the average of three or more biological replicates, and standard deviations are shown as the error bar.

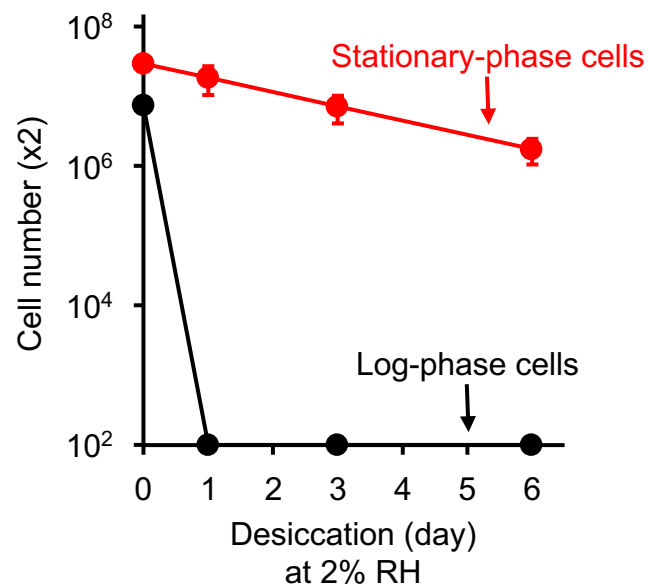

**Supplementary Figure 1.** Desiccation tolerance of *A. baumannii* AB5075 cells from the log-phase and stationary-phase of growth. The cell number represents a total number of viable cells recovered from each membrane. The data are the averages of three or more biological replicates, and standard deviations are shown as error bars.

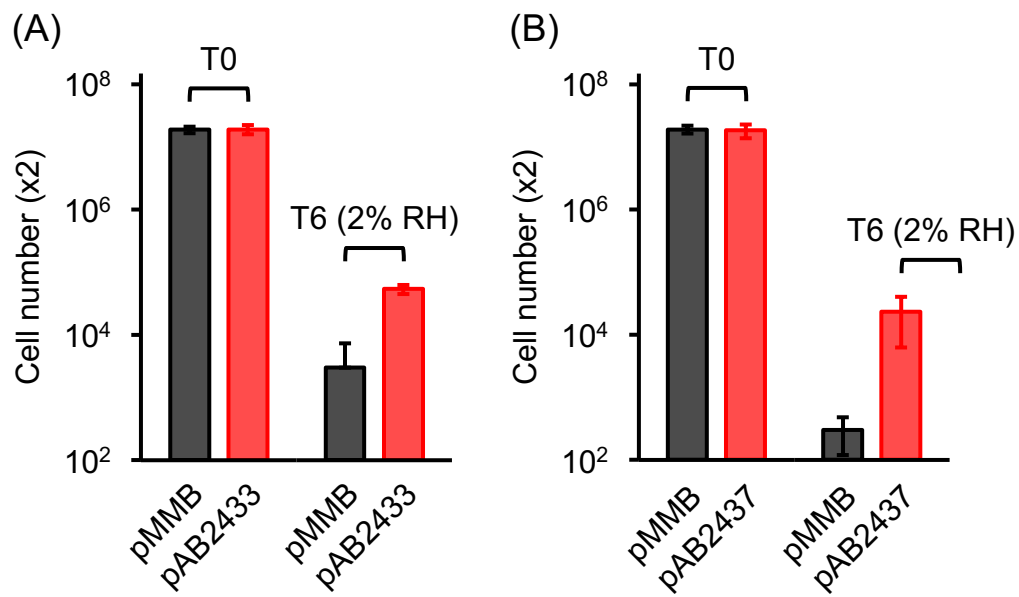

**Supplementary Figure 2.** Complementation of desiccation phenotypes of (A) ABUW\_2433::Tn and (B) ABUW\_2437::Tn after 0 days (control) and 6 days of desiccation at 2% RH. Empty vector (pMMB) was used as a control. The data are the average of three or more biological replicates, and standard deviations are shown as the error bars.
